## Microarray analysis of verbenalin-treated human amniotic epithelial cells reveals therapeutic potential for Alzheimer's Disease

Farhana Ferdousi<sup>1</sup>, Shinji Kondo<sup>2</sup>, Kazunori Sasaki<sup>1,3</sup>, Yoshiaki Uchida<sup>4</sup>, Nobuhiro Ohkohchi<sup>5</sup>, Yun-Wen Zheng<sup>5</sup>, Hiroko Isoda<sup>1,2,3,6</sup>

<sup>1</sup>Alliance for Research on the Mediterranean and North Africa (ARENA), University of Tsukuba, Tsukuba 305-8577, Ibaraki, Japan

<sup>2</sup>R&D Center for Tailor-Made QOL, University of Tsukuba, Tsukuba 305-8550, Ibaraki, Japan

<sup>3</sup>National Institute of Advanced Industrial Science and Technology (AIST), Tsukuba 305-8565, Ibaraki, Japan

<sup>4</sup>School of Integrative and Global Majors, University of Tsukuba, Tsukuba 305-8575, Ibaraki, Japan

<sup>5</sup>Department of Gastrointestinal and Hepato-Biliary-Pancreatic Surgery, Faculty of Medicine, University of Tsukuba, Tsukuba 305-8575, Ibaraki, Japan

<sup>6</sup>Faculty of Life and Environmental Sciences, University of Tsukuba, Tsukuba 305-8575, Ibaraki, Japan

**Correspondence to:** Hiroko Isoda; **email:** [isoda.hiroko.ga@u.tsukuba.ac.jp](mailto:isoda.hiroko.ga@u.tsukuba.ac.jp)

**Keywords:** Alzheimer's disease, verbenalin, human amnion epithelial cell, microarray analysis, natural compound

**Received:** September 10, 2019

**Accepted:** March 24, 2020

**Published:** March 29, 2020

**Copyright:** Ferdousi et al. This is an open-access article distributed under the terms of the Creative Commons Attribution License (CC BY 3.0), which permits unrestricted use, distribution, and reproduction in any medium, provided the original author and source are credited.

### ABSTRACT

Alzheimer's disease (AD) has become a major world health problem as the population ages. There is still no available treatment that can stop or reverse the progression of AD. Human amnion epithelial cells (hAECs), an alternative source for stem cells, have shown neuroprotective and neurorestorative potentials when transplanted *in vivo*. Besides, studies have suggested that stem cell priming with plant-derived bioactive compounds can enhance stem cell proliferation and differentiation and improve the disease-treating capability of stem cells. Verbenalin is an iridoid glucoside found in medicinal herbs of Verbenaceae family. In the present study, we have conducted microarray gene expression profiling of verbenalin-treated hAECs to explore its therapeutic potential for AD. Gene set enrichment analysis revealed verbenalin treatment significantly enriched AD-associated gene sets. Genes associated with lysosomal dysfunction, pathologic angiogenesis, pathologic protein aggregation, circadian rhythm, age-related neurometabolism, and neurogenesis were differentially expressed in the verbenalin-treated hAECs compared to control cells. Additionally, the neuroprotective effect of verbenalin was confirmed against amyloid beta-induced neurotoxicity in human neuroblastoma SH-SY5Y cells. Our present study is the first to report the therapeutic potential of verbenalin for AD; however, further in-depth research in the *in vitro* and *in vivo* models are required to confirm our preliminary findings.

### INTRODUCTION

Alzheimer's disease (AD) is a prevalent neurodegenerative disorder accounting for at least two-thirds of cases of dementia in people aged 65 and over. AD is characterized by progressive deterioration of cognitive function and memory [1]. Although increasing age is the most important known risk factor for AD, a combination of genetic, lifestyle,

and environmental factors also contribute to the pathologic progress of AD [2]. With a rapidly aging world population, AD has become a major health problem in both developed and developing nations. Globally in 2016, the prevalence of AD and other dementias was estimated to be 43.8 million, with 2.4 million deaths making AD and dementia the fifth-largest cause of death. It is projected that by 2050, the number of people living with AD and dementia would

be over 100 million [3]. Currently, cholinesterase inhibitors and memantine are the only medicines approved in the US and Europe; however, they only provide short-term improvement of AD symptoms for a short period of six to eighteen months. There are more than 100 compounds under investigation for the possible treatment of AD [4]. Continuing efforts are still required to develop medicines as well as novel, practical strategies that would slow the progression, halt, or prevent AD and other dementias and recover cognitive functions.

Current advances in stem-cell-based therapies or approaches, such as the promotion of endogenous neurogenesis, transplantation of exogenous stem cells, etc. have shed light on novel treatment strategies of AD [5, 6]. However, the high cost, time-consuming, and labor-intensive nature of stem cell therapy limit its use. And therefore, identification of a suitable stem cell source with therapeutic applications has become a top priority. Human amnion epithelial cells (hAECs), isolated from a medical waste product such as discarded term placenta, are gaining interest as a new alternative source of stem cells as they have similar pluripotent and multipotent properties of stem cells. Moreover, they have the further advantage over embryonic stem cells (ESCs) and induced pluripotent stem cells (iPSCs), such as they are readily available, they do not form teratomas *in vivo*, have low immunogenicity and low rejection rate, have immunomodulatory and anti-inflammatory properties, and pose far fewer ethical concerns [7]. Evidences have shown that hAECs can cross the blood-brain barrier where they can engraft and survive for up to 60 days, and eventually can promote the survival and regeneration of neurons, synthesize and release neurotrophic factors and neurotransmitters, and reestablish the damaged neural connections, suggesting that hAECs may be one of the most promising candidates for cell-based therapy of neurological diseases [8–11].

Recent advanced researches on plant extracts and their bioactive compounds are bringing into light their importance in regenerative medicine. In this regard, several priming approaches using natural compounds have been proposed in recent years to activate stem cells for proliferation and differentiation and to improve the survival, function, and therapeutic efficacy of stem cells [12–14]. Moreover, recent evidence shows that the outcome of stem cell therapy in neurodegenerative diseases can be improved through the combination of adjunct treatments [15, 16]. Natural compounds of dietary origin, known as nutraceuticals, would be promising candidates to produce synergistic effects with stem cell therapy. Several studies have already suggested the protective properties of natural

compounds against age-related neurodegenerative diseases [17, 18]. Therefore, *in vitro* enrichment or preconditioning of stem cells in the presence of a specific plant extract or its pharmacologically active substance can open a new horizon for regenerative medicine and treatment; however, exploration of the strategies in this regard has been sparse.

Verbenalin is an iridoid glucoside found in medicinal herb *Verbena officinalis* (*V. officinalis*) and other plants of the Verbenaceae family, such as *Lippia citriodora* [19–21]. The plant *V. officinalis*, also known as “holy plant”, is native to Europe and the Mediterranean region. Herbal tea made from *V. officinalis* has traditionally been used for the treatment of insomnia as well as a home remedy for headache, fever, depression, and nervous exhaustion. Verbenalin, one of the major constituents of this plant, has been reported to exhibit sleep-promoting and antioxidant activities [20, 22, 23]. In our previous study, we have reported relaxation and anti-depressant effects of lemon verbena (*Lippia citriodora*) extract, rich in verbascoside and verbenalin, both in the *in vitro* and *in vivo* models [24]. In the present study, we have treated hAECs with verbenalin for seven days and conducted microarray analysis to investigate the changes in gene expression and to explore its therapeutic potential for AD. Additionally, we evaluated the neuroprotective effect of verbenalin against amyloid beta-induced neurotoxicity in human neuroblastoma SH-SY5Y cells.

## RESULTS

### Characteristics of differentially expressed genes (DEGs)

In the present study, control hAEC spheroids were maintained in the placental basal medium, and the treatment hAEC spheroids were treated with 20  $\mu$ M of verbenalin for seven days. The effective concentration of verbenalin on hAEC was determined using the mitochondrial-dependent reduction of 3-(4,5-dimethylthiazol-2-yl)-2,5-diphenyl tetrazolium bromide (MTT) assay (Supplementary Figure 1). Microarray analysis was conducted on three biological replicates of day 7 (d7) control and treatment samples, and two biological replicates of day 0 (d0) control samples. Genes satisfy both *p*-value <0.05 (one-way between-subjects ANOVA) and fold-change (in linear space) > 1.1 criteria simultaneously were considered as differentially expressed genes (DEGs) and were included for gene ontology (GO) analysis.

We found a total of 383 unique genes were consistently differentially expressed in all three replicates of verbenalin-treated cells and were considered as DEGs

for further analysis. Among the DEGs, 137 genes were upregulated, and 246 genes were downregulated. Figure 1A shows a volcano plot displaying the DEGs. The red dots represent the significantly upregulated genes, and the green dots represent the significantly downregulated genes. There were several genes which showed large relative differences, or fold changes, however, the fold changes were not consistent among the replicates, thus, were not included for further analysis (Figure 1A, grey dots represent the non-significant genes).

Figure 1B shows the distribution of fold changes of the DEGs. Most of the DEGs (80%) showed fold change <1.4, probably because we did not add any supplement other than verbenalin in the treated cells. For the GO analysis, we have included all the genes with fold change >1.1 (and,  $p < 0.05$ ) to explore the molecular changes which might be small in magnitude but are consistent. Tissue expression analysis by the 'functional annotation' tool of DAVID (Database for Annotation, Visualization and Integrated Discovery)

software revealed that 49% of DEGs were brain-specific (Figure 1C). Further analysis of brain-specific DEGs showed that 34% genes were previously reported to be expressed in pons ( $n = 131$ ), 23% in medulla oblongata ( $n = 90$ ), 21% in parietal lobe ( $n = 82$ ), and 20% in subthalamic nucleus ( $n = 75$ ). Gene family analysis of the DEGs revealed 25 genes were transcription factors (TFs), 11 were protein kinases, and seven were growth factors. Top 20 significantly upregulated and downregulated genes and their related GO have been listed in Supplementary Tables 1 and 2, respectively.

### Significantly enriched cellular components and biological process

Figure 2 shows significantly enriched cellular components (Figure 2A) and biological processes (Figure 2B) by DEGs in verbenalin-treated hAECs according to false discovery rate (FDR) q-value and p-value, respectively. Significantly enriched top cellular components include, but not limited to, cell projection

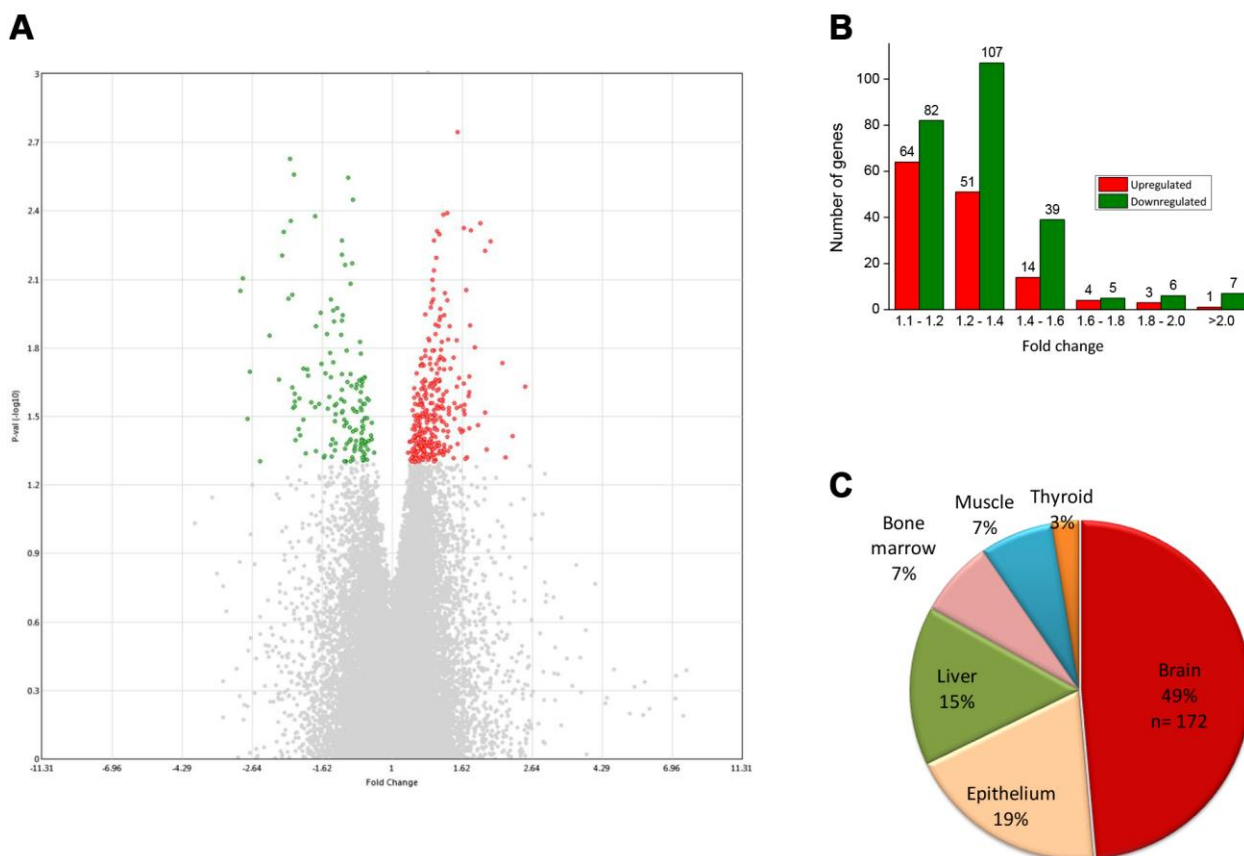

**Figure 1.** (A) Volcano plot displaying DEGs between verbenalin-treated and untreated-control hAECs on day 7 (performed in Transcriptome Analysis Console version 4 software). The vertical axis (y-axis) corresponds to  $-\log_{10}$  p-value of the ANOVA p-values, and the horizontal axis (x-axis) displays linear fold change. The red dots represent the up-regulated genes; the green dots represent the downregulated genes. (B) Distribution of fold changes in mRNA expression levels in verbenalin-treated hAECs (C) Pie chart showing the enriched ( $p < 0.05$ ) tissue expressions by the DEGs between verbenalin-treated and untreated-control hAECs on day 7 (analyzed by DAVID online tool).

(GO: 0042995), cytoskeleton (GO: 0005856), cell junction (GO: 0030054), neuron part (GO: 0097458), dendrite (GO: 0030425), and synapse (GO: 0045202). Significantly enriched top biological processes are positive regulation of dendrite development (GO: 1900006), negative regulation of type 2 immune response (GO: 0002829), guanosine triphosphatase (GTPase) activity (GO: 0043547), vasoconstriction (GO: 0045907), protein ubiquitination (GO: 0031398), regulation of GTPase mediated signal transduction (GO: 0051056), cell motility (GO: 20000145), and microtubule cytoskeleton organization (GO: 0000226).

### Significantly enriched Kyoto Encyclopedia Of Genes And Genomes (KEGG) pathways

Figure 2C shows the significantly enriched ( $p < 0.05$ ; modified Fisher's exact test) KEGG pathways by the DEGs. Several signaling pathways, namely ErbB, mitogen-activated protein kinase (MAPK), Gonadotropin-releasing hormone (GnRH), and calcium

signaling pathways, as well as pathways in cancer, were significantly overrepresented. Other significantly enriched signaling pathways include regulation of actin cytoskeleton, adherens junction, axon guidance, and dorsoventral axis.

### Gene set enrichment analysis (GSEA) reveals regulation of AD-related gene sets

Table 1 listed important gene sets that were significantly enriched by the DEGs between d7 verbenalin-treated and control hAECs. Gene sets were identified using the Molecular Signatures Database (MSigDB) of GSEA. Interestingly, we found that 44 DEGs were overlapped with the gene set that is upregulated in the brain from the patients with AD ( $p=1.31 \times 10^{-12}$ ). We also found that 29 DEGs were overlapped with the gene set that is downregulated in the brain from AD patients ( $p=1.02 \times 10^{-7}$ ) [25]. Neurogenesis-, neuron differentiation-, and nervous system development- associated gene sets were also highly enriched.

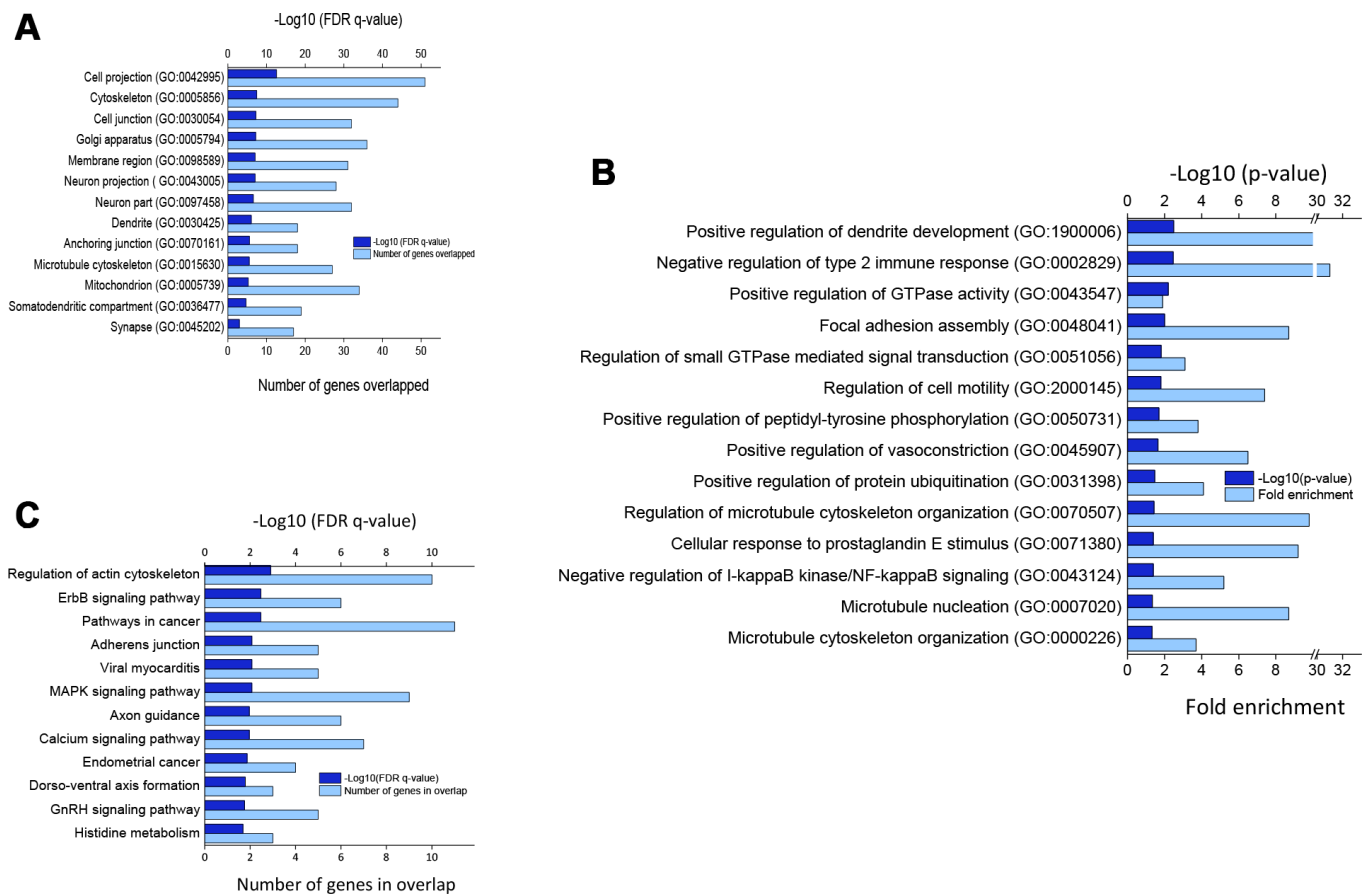

**Figure 2.** (A) Significantly enriched cellular components for DEGs. (B) Top biological processes as per p-value (modified Fisher's exact) by DEGs. (C) Significantly enriched KEGG pathways by DEGs ( $p < 0.05$ ; modified Fisher's exact test). All the gene ontology enrichment analyses were performed using DAVID online tool.

**Table 1. Significantly enriched gene sets by DEGs between verbenalin-treated and control cells.**

| Gene set*                                                                                              | Systematic name, Gene Ontology | No. of genes in set | No. of Genes in Overlap | p-value               | FDR q-value          |
|--------------------------------------------------------------------------------------------------------|--------------------------------|---------------------|-------------------------|-----------------------|----------------------|
| Genes up-regulated in brain from patients with Alzheimer's disease                                     | M12921                         | 1691                | 44                      | 1.31 e <sup>-12</sup> | 2.87 e <sup>-9</sup> |
| Neurogenesis <sup>1</sup>                                                                              | M13908, GO:0022008             | 1402                | 36                      | 2.42 e <sup>-10</sup> | 1.87 e <sup>-7</sup> |
| Regulation of neuron differentiation <sup>2</sup>                                                      | M12739, GO:0045664             | 554                 | 19                      | 6.44 e <sup>-8</sup>  | 1.25 e <sup>-5</sup> |
| Regulation of nervous system development <sup>3</sup>                                                  | M11450, GO:0051960             | 750                 | 22                      | 9.09 e <sup>-8</sup>  | 1.65 e <sup>-5</sup> |
| Genes down-regulated in brain from patients with Alzheimer's disease                                   | M17728                         | 1237                | 29                      | 1.02 e <sup>-7</sup>  | 2.99 e <sup>-5</sup> |
| Genes up-regulated during later stage of differentiation of Oli-Neu cells (oligodendroglial precursor) | M2368,                         | 570                 | 9                       | 1.64 e <sup>-5</sup>  | 1.17 e <sup>-2</sup> |
| Neuromuscular process <sup>4</sup>                                                                     | M15744, GO:0050905             | 97                  | 4                       | 1.15 e <sup>-4</sup>  | 2.84 e <sup>-2</sup> |

\*GSEA online software (<http://software.broadinstitute.org/gsea/index.jsp>).

<sup>1</sup>Generation of cells within the nervous system.

<sup>2</sup>Any process that modulates the frequency, rate or extent of neuron differentiation.

<sup>3</sup>Any process that modulates the frequency, rate or extent of nervous system development, the origin and formation of nervous tissue.

<sup>4</sup>Any process pertaining to the functions of the nervous and muscular systems of an organism.

### Verbenalin treatment regulated AD-associated genes in hAECs

We found that a total of 73 AD-associated genes were regulated in the verbenalin-treated hAECs, among which 44 were reported to be upregulated (termed as 'group A' genes), whereas 29 genes were reported to be downregulated (termed as 'group B' genes) in the brain from patients with AD [25]. In the verbenalin-treated hAECs, 32 'group A' genes were downregulated, and 12 were upregulated. Figure 3A shows the heatmap of the relative gene intensity of the downregulated AD-associated genes. Seven genes of this 'group A' genes were previously reported to be upregulated at the incipient stage of AD, namely TAO Kinase 2 (*TAOK2*), Carnitine Palmitoyl Transferase 2 (*CPT2*), Tumor Protein D52 (*TPD52*), Interferon, Alpha 5 (*IFNA5*), Transmembrane Protein 8A (*TMEM8A*), Family with Sequence Similarity 3, Member A (*FAM3A*), and Rho GTPase Activating Protein (*ARHGAP*) 17 (*ARHGAP17*), all of which were downregulated in the treatment cells. Several transcription factors were among the 'group A' genes, such as Cut-Like Homeobox 1 (*CUX1*), Nuclear Receptor Subfamily 2, Group F, Member 6 (*NR2F6*), SERTA Domain Containing 2 (*SERTAD2*), TATA-Box Binding Protein Associated Factor (*TAF*) 11 (*TAF11*), *TAF15*, Transcription Factor 7-Like 1 (*TCF7L1*), Trichorhinophalangeal Syndrome I (*TRPS1*), and Upstream Transcription Factor 2 (*USF2*). Among the 'group B' genes, 25 were downregulated, and four were upregulated in the verbenalin-treated cells. Further analysis of these 25 genes showed overlap with the genes

associated with 'cell death' (n=6), 'genes whose expression significantly and positively correlated with the density of calbindin-containing gamma-Aminobutyric acid-ergic (GABAergic) neurons from prefrontal cortex (Brodmann area 9 (BA9) brain region) across all subjects with psychiatric disorders, such as bipolar disorder, depression, and schizophrenia' (n=10) [26], and 'genes whose expression significantly and positively correlated with oligodendrocyte density in layer VI (n=7), and layer III (n=5) of the BA9 brain region in patients with bipolar disorder' [26]. We also found 11 genes of 'group B' were reported to be strongly associated with late-onset of AD [27] (Figure 3B), and five genes were associated with neurodegeneration (Figure 3C). Figure 3D shows the boxplots for the relative ratios of gene intensity (genes presented in the heat maps) compared between d7 control vs. d0 control and verbenalin-treated hAECs vs. d0 control. When compared with d0 control, d7 verbenalin-treated hAECs showed a better effect on AD-associated genes than d7 untreated control hAECs. Several genes (n = 22) associated with interactions of pathological hallmark proteins tubulin polymerization promoting protein/P25,  $\beta$ -amyloid, and  $\alpha$ -synuclein [28] were also found to be regulated in the treatment cells. List of AD-associated genes and their fold changes compared with d0 and d7 controls is given in the Supplementary Table 3.

### Verbenalin treatment regulated the gene expression of the receptors of the ErbB pathway

The dysregulation of ErbB signaling in humans is associated with the development of AD. In the

microarray analysis, we found that verbenalin treatment significantly downregulated the expression of epidermal growth factor (EGF) receptor (*EGFR*) (fold change -1.41), and vascular endothelial growth factor B (*VEGFB*) (fold change -1.89). On the other hand, the expression of neuregulin 1 (*NRG1*) was significantly upregulated (fold change 1.34). A similar gene expression result was found in the real-time PCR (RT-PCR) analysis (Figure 4A). Although not significant, *EGFR* and *NRG1* showed similar protein expression patterns as gene expression (Figure 4B). However, *VEGF* showed a slight upregulation in protein expression (Figure 4B). *NRG1* is the first discovered member of the NRG family that contains the EGF-like domain. NRGs and related EGF-domain containing proteins interact with different receptor tyrosine kinases of the ERBB family (ERBB1- 4) and initiate intracellular signaling pathways in a specific way. *NRG1* is the direct ligand for ERBB3 and ERBB4

tyrosine kinase receptors, and concomitantly recruits ERBB1 and ERBB2 coreceptors, resulting in ligand-stimulated tyrosine phosphorylation and activation of the ERBB receptors. Adenomatous polyposis coli (*APC*) that acts as a mediator of ERBB2-dependent stabilization of microtubules at the cell cortex was downregulated (fold change -1.13).

### Verbenalin treatment regulated expression of genes of Rho family GTPases

The Rho GTPases belong to the Ras superfamily of small (molecular weight ~21kDa) guanine nucleotide-binding proteins (G-proteins). The most extensively studied members of the Rho family are Ras Homolog Family Member A (*RHOA*), Ras-related C3 botulinum toxin substrate 1 (*RAC1*), and cell division cycle 42 (*CDC42*). We found that verbenalin treatment significantly downregulated the expression of several

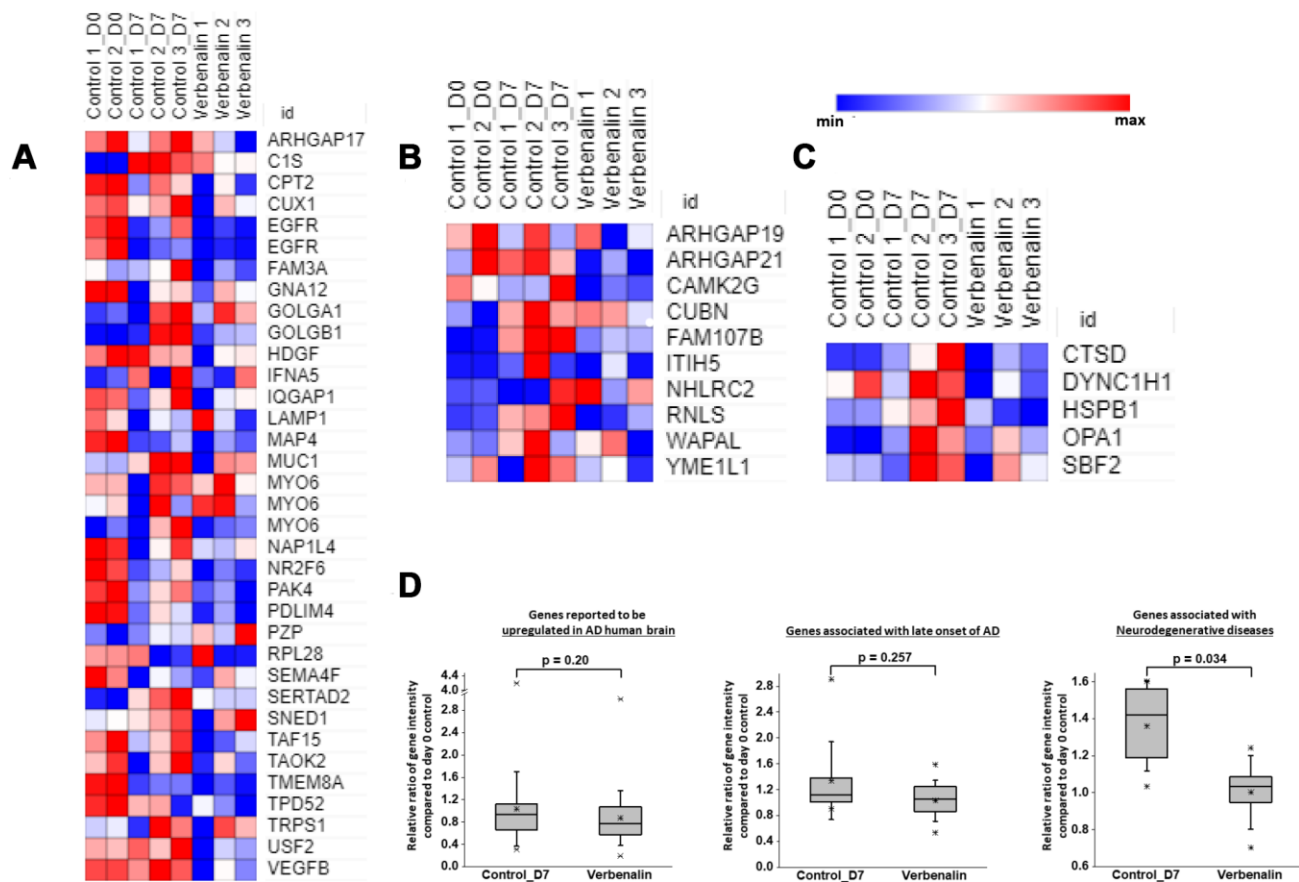

**Figure 3.** Heat maps showing relative expression intensity of genes reported to be (A) upregulated in AD human brain, (B) strongly associated with late-onset of AD, (C) associated with neurodegenerative diseases in untreated control hAECs on day 0 and day 7, and in verbenalin-treated hAECs on day 7. (D) Boxplots for the relative ratios of gene intensity (genes presented in the heat maps) in day 7 control (Control\_D7) and verbenalin-treated hAECs compared with day 0 control. Box ranges from 25<sup>th</sup> to 75<sup>th</sup> percentile, the line in the middle represents the median value, the whiskers represent the min, max, and mean values, and the error bar represents the SD. Significance was computed by One-way ANOVA for linear distribution and Mann-Whitney U test for nonlinear distribution. Heat maps were generated using Morpheus online tool.

genes of ARHGAP, such as *ARHGAP21* (fold change -2.00), *ARHGAP17* (fold change -1.38), *ARHGAP4* (fold change -1.37), *ARHGAP19* (fold change -1.11). *ARHGAP21* functions as the GTPase activator for *RHOA* and *CDC42*, *ARHGAP17* for *CDC42*, and *ARHGAP19* for *RHOA*. We also found the downregulation of family with sequence similarity 65, member B (*FAM65B*), an inhibitor of the small GTPase RhoA (fold change -1.93). Additionally, pleckstrin homology domain-containing family G member 6 (*PLEKHG6*), a guanine nucleotide exchange factor activating the small GTPase RhoA, was also downregulated (fold change -1.38).

### Verbenalin treatment regulated genes associated with circadian entrainment

Circadian entrainment is the biological process by which endogenous oscillations are synchronized with external cues, such as daily light and temperature cycles, within a period of ~24 h. The circadian clock

coordinates the daily molecular, hormonal, physiological, and behavioral rhythms. We found several genes associated with circadian rhythm were downregulated in the verbenalin-treated hAECs, such as TFs NK2 homeobox 1 (*NKX2-1*; fold change -1.13) and retinoic acid-induced protein 1 (*RAI1*; fold change -1.13), imprinted gene GNAS complex locus (*GNAS*; fold change -1.27), and G protein beta polypeptide 1 (*GNB1*; fold change -1.19). Although not specific, there was also the downregulation of voltage-gated Ca<sup>2+</sup> channel *CACNA1C* (fold change -1.13) and Ca<sup>2+</sup>/calmodulin-dependent kinase (CAMK) II gamma (*CAMK2G*; fold change -2.07) in the verbenalin-treated cells.

### Verbenalin treatment showed neuroprotective effects against A $\beta$ -induced cytotoxicity in human neuroblastoma SH-SY5Y cells

As unexpectedly, our study results showed that verbenalin treatment could significantly regulate AD-

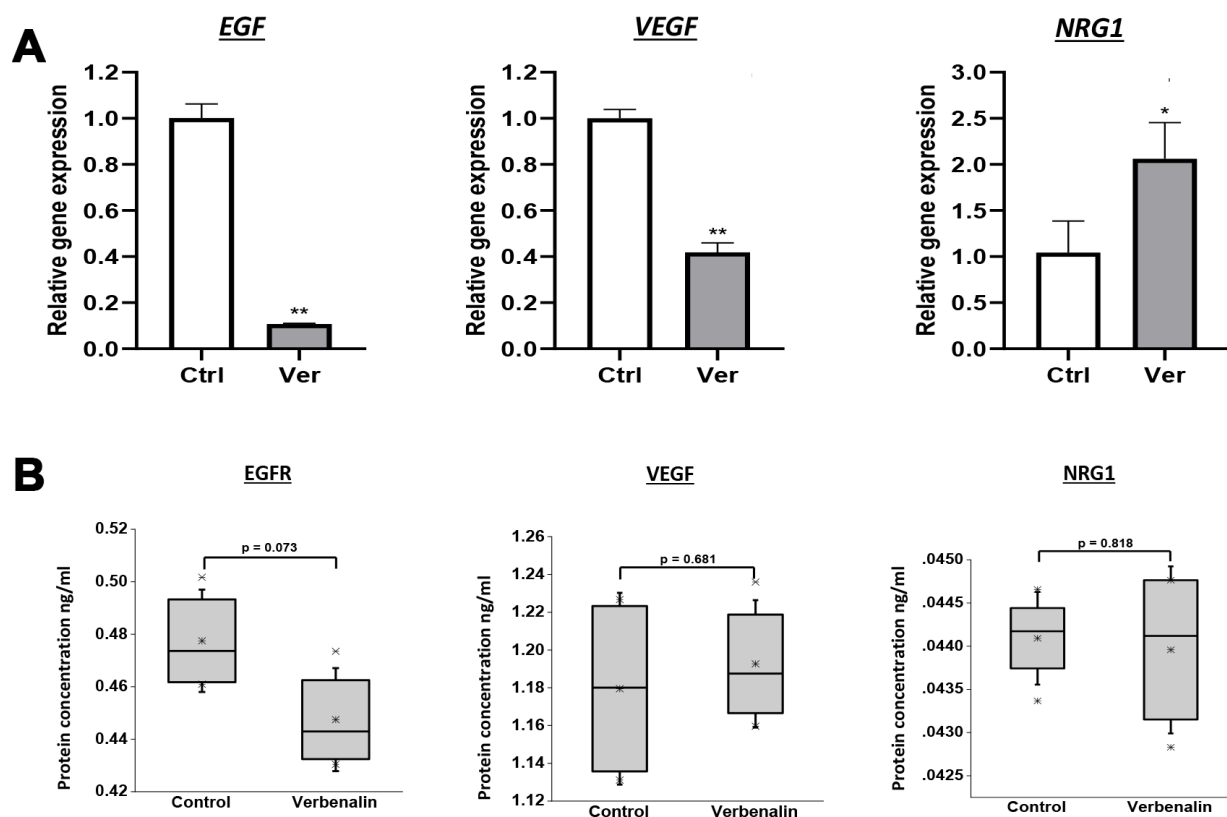

**Figure 4. Effect of verbenalin treatment on the expressions of EGF, VEGF, and NRG1.** The hAECs were treated with 20  $\mu$ M of verbenalin (Ver) for 7 days, while the control cells were maintained in the placental basal medium. (A) Gene expressions were evaluated by real-time PCR. Each value represents the mean  $\pm$  SD (n = 3). Asterisks refer to statistical significance (\*p < 0.05, \*\*p < 0.01) by One-way ANOVA as compared with control (Ctrl). (B) Boxplots of protein concentration (ng/ml) obtained by ELISA (n = 4). Box ranges from 25<sup>th</sup> to 75<sup>th</sup> percentile, the line in the middle represents the median value, the whiskers represent the min, max, and mean values, and the error bar represents the SD. The difference in protein concentration between treatment and control group was measured using One-way ANOVA for linear distribution.

associated genes in hAECs, we investigated its neuroprotective effects against A $\beta$ -induced cytotoxicity in human neuroblastoma-derived SH-SY5Y cells. The human SH-SY5Y cell line is a widely-used cellular model to examine the toxic effects of amyloid peptides. We found that verbenalin was nontoxic up to the concentration of 20  $\mu$ M (Figure 5A). Therefore, 20  $\mu$ M of verbenalin was used for determining its effects on A $\beta$ -induced neuronal cell damage. When SH-SY5Y cells were exposed to 5  $\mu$ M of A $\beta$  for 72 h, there was significant cell death compared with untreated controls (Figure 5B). However, in cultures pre-treated with 20  $\mu$ M of verbenalin for 24 h (Figure 5B), the A $\beta$ -induced cell death was significantly reduced compared to only A $\beta$ -treated conditions, suggesting the neuroprotective effect of verbenalin against A $\beta$ -induced cytotoxicity in SH-SY5Y cells.

### Verbenalin treatment significantly ameliorated the A $\beta$ -induced decline of ATP levels in SH-SY5Y cells

Figure 5C shows the effect of verbenalin treatment on A $\beta$ -induced ATP decline. Exposure to 5  $\mu$ M of A $\beta$  for 24 h resulted in a significant decrease in ATP production compared to control cells. However, pretreatment with verbenalin for 24 h could rescue the reduction of ATP production in A $\beta$ -treated SH-SY5Y cells ( $p < 0.01$ ).

### Verbenalin treatment attenuated A $\beta$ -induced reactive oxygen species (ROS) generation in SH-SY5Y cells

The effect of verbenalin treatment on oxidative stress was detected by testing the level of intracellular ROS. Figure 5D shows that after exposure to 5  $\mu$ M of A $\beta$  for

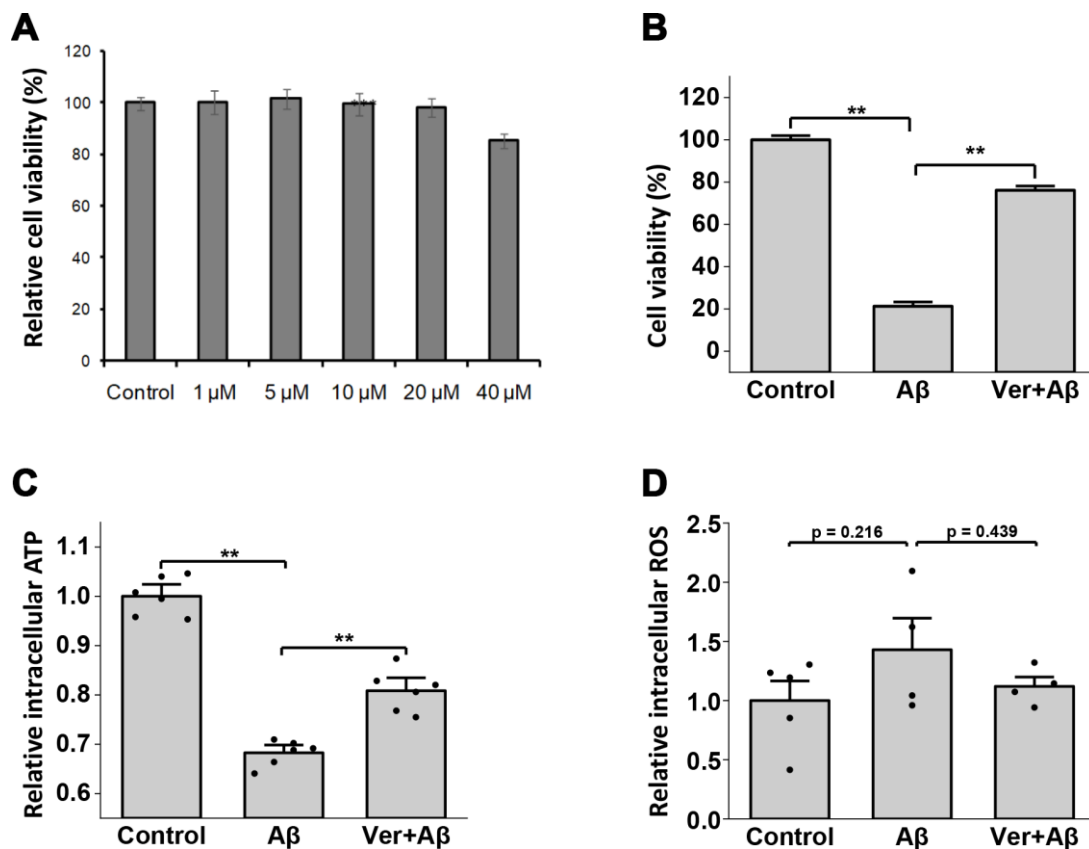

**Figure 5. Neuroprotective effects of verbenalin (Ver) on amyloid beta (A $\beta$ )-induced toxicity in human neuroblastoma SH-SY5Y cells.** (A) Cells were exposed to verbenalin at concentrations of 1, 5, 10, 20, and 40  $\mu$ M for 72 h. The control cells were not treated. Cell viability was measured by the MTT assay and was calculated as a percentage of that in the control group (100%). The results are expressed as the means  $\pm$  standard error of the mean (SEM) of independent experiments ( $n = 6$ , 96-well plate). \*\*\* $p < 0.001$  as compared to control. Cells were pre-treated with 20  $\mu$ M verbenalin for 24 h and then exposed to 5  $\mu$ M A $\beta$  for 72 h. The results are expressed as the means  $\pm$  standard error of the mean (SEM) of independent experiments ( $n = 6$ , 96-well plate).  $^{\dagger}p < 0.1$ ,  $^*p < 0.05$ ,  $^{**}p < 0.01$  compared with the group exposed to A $\beta$  only (ANOVA followed by Dunnett's multiple comparisons test). (B) Cell viability was measured by the MTT assay and was calculated as a percentage of that in the control group (100%). (C) A bioluminescence assay was used to measure cellular ATP levels, and the results are shown as relative intracellular ATP levels. (D) Levels of intracellular reactive oxygen species (ROS) were measured using a fluorescence cell-based assay, and results are shown as relative intracellular ROS ( $n=4$ ).



24 h, ROS production was increased compared to untreated cells ( $p = 0.22$ ). When the cells were pretreated with 20  $\mu\text{M}$  of verbenalin for 24 h, ROS production was decreased compared to only  $\text{A}\beta$ -treated SH-SY5Y Cells ( $p = 0.44$ ), suggesting the preventive effect of verbenalin against  $\text{A}\beta$ -induced oxidative stress. However, the changes did not achieve statistical significance.

**Verbenalin treatment regulated the expressions of *EGFR*, *VEGF*, and *NRG1* in  $\text{A}\beta$ -induced SH-SY5Y cells**

We investigated how verbenalin treatment could modulate the expressions of *EGFR*, *VEGF*, and *NRG1* in  $\text{A}\beta$ -induced neurotoxic condition. Figure 6A shows that verbenalin could inhibit  $\text{A}\beta$ -induced *EGFR* activation, and upregulated the expressions of *VEGF* and *NRG1*. *EGFR* and *NRG1* showed similar protein expression patterns as gene expression (Figure 6B).

**DISCUSSION**

AD is a progressive neurodegenerative disease overlaid with neuropsychiatric and behavioral symptoms [29]. The current pharmacologic therapy for AD only provides short term alleviation of symptoms. In recent years, hAECs and alternative sources of adult stem cells have been gaining interest in regenerative medicine for the treatment of neurodegenerative diseases [10, 30]. Xue et al., have reported that intracerebroventricular transplantation of hAEC in the transgenic AD model mice could improve cognitive functions, and increase acetylcholine levels and the number of hippocampal neurites [8]. Another study has reported that intravenous injection of human amniotic membrane-derived mesenchymal stem cells in transgenic AD mouse models improved AD pathology and memory function through regulating oxidative stress [31]. With advances in stem cell biology and regenerative medicine, it is reasonable to construct new approaches that may improve the treatment options. Recently, plant extracts

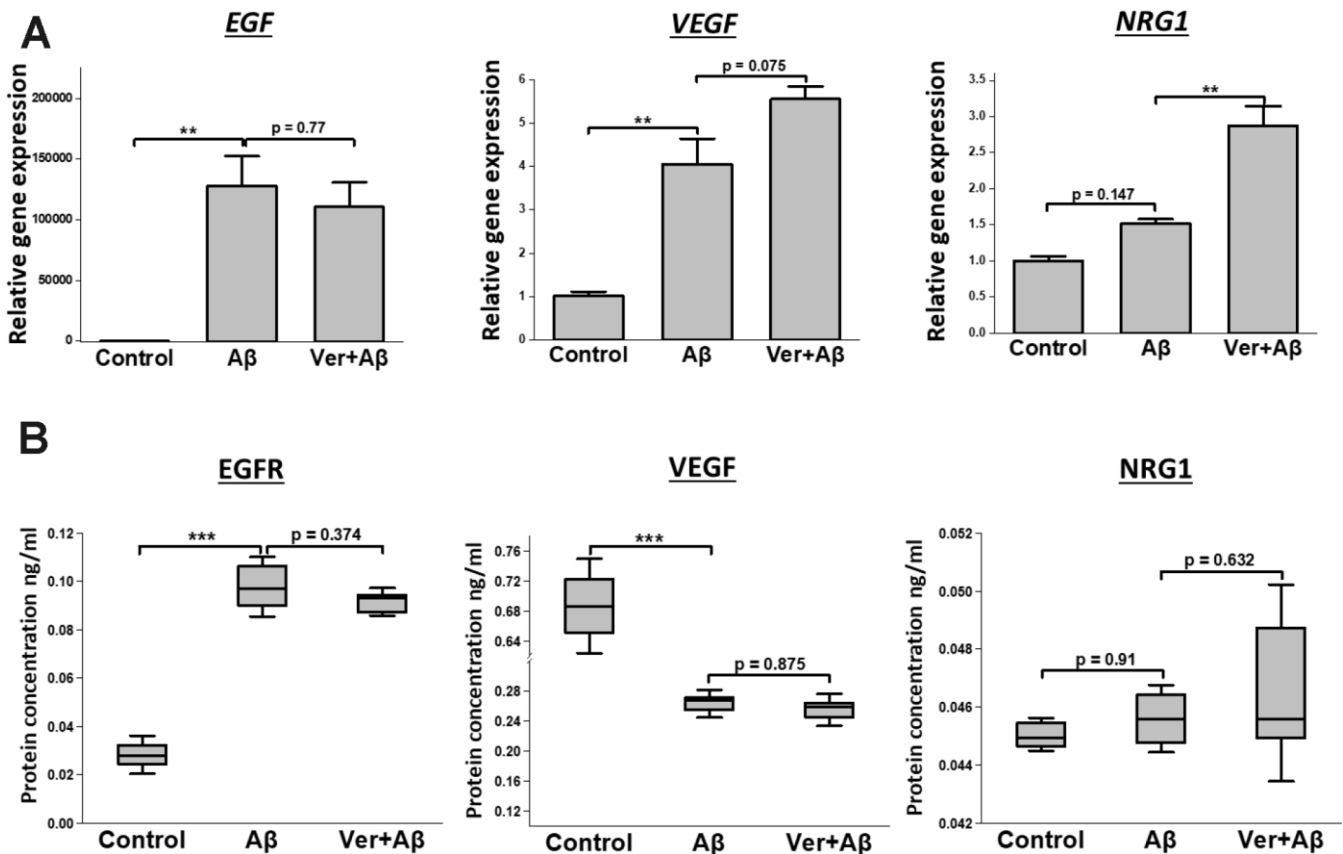

**Figure 6. Effect of verbenalin treatment on the expressions of *EGF*, *VEGF*, and *NRG1* in  $\text{A}\beta$ -induced human neuroblastoma SH-SY5Y cells. (A) Gene expressions were evaluated by real-time PCR. Each value represents the mean  $\pm$  SD ( $n = 4$ ). (B) Boxplots of protein concentration (ng/ml) obtained by ELISA ( $n = 4$ ). Box ranges from 25<sup>th</sup> to 75<sup>th</sup> percentile; the line in the middle represents the median value; the error bar represents the SD. Asterisks refer to statistical significance (\* $p < 0.05$ , \*\* $p < 0.01$ , \*\*\* $p < 0.001$ ) by One-way ANOVA followed by Dunnett’s multiple comparisons test (for linear distribution) as compared with only  $\text{A}\beta$ -treated group.**

and their bioactive compounds have received considerable attention because of their distinct pharmacology profiles, such as the rapid onset of action, less side effect profile, potential drug synergies, and most importantly because of their ability to improve proliferation, differentiation and therapeutic efficacy of stem cells [2, 4, 12–14]. On the other hand, microarray gene expression profiling is a useful tool to explore genome-wide expression patterns that are activated during studied biological conditions and provides a foundation for further examination of molecular mechanisms and regulatory pathways. Therefore, in the present study, we conducted a microarray analysis of the gene expression pattern of verbenalin-treated hAECs to explore its health beneficial potentials.

The study results revealed that verbenalin treatment could significantly enrich the priori-defined AD-associated gene sets (Table 1) that analyzed hippocampal gene expression of AD patients of varying severity [25]. Most importantly, we found that verbenalin treatment could significantly downregulate the expression of *EGFR*, which is thought to play the central role in the neuronal and metabolic interaction during the aging process. Several studies have demonstrated the role of EGFR in neurometabolic pathophysiology, aging-related metabolic activity, as well as age-related neuronal survival and regeneration [32, 33]. On the other hand, there was significant upregulation of *NRG1*, a member of growth and differentiation factor containing EGF-like signaling domain. NRG1 is reported to attenuate cognitive function impairments in mice model of AD via inducing neurogenesis [34]. Importantly, NRG1 and other EGF-like proteins interact with receptor tyrosine kinases of the ERBB family and initiate specific intracellular signaling pathways [35]. We also found significant downregulation of several ARHGAPs in verbenalin-treated hAECs, which may contribute to inhibition of tyrosine kinases [36], resulting in inhibition of EGFR. Therefore, the NRG1/ErbB and EGFR/ErbB signaling pathways need to be carefully investigated to confirm the AD-preventing potential of verbenalin in hAECs.

Additionally, VEGFB, the growth factor for endothelial cells, was downregulated in verbenalin-treated hAECs. VEGF is the central component of pathological blood vessel formation, and it was reported that EGFR and ERBB2 signaling pathway plays an essential role in VEGF regulation in carcinoma cells [37]. Postmortem studies on human brains found evidence of increased angiogenesis in the hippocampus, mid-frontal cortex, and other parts of AD brains compared to healthy individuals [38]. The amalgamation of accumulated A $\beta$  and neuroinflammation causes diminished blood perfusion of the brain, leading to hypoperfusion/hypoxia-induced

angiogenesis through the upregulation of several pro-angiogenic factors, particularly VEGF [39, 40].

Another important TF that was downregulated in verbenalin-treated hAECs is *NR2F6* (fold change -1.54), also known as eosinophil cationic protein 2 (*EAR2*). Ear2 deletion was reported to cause early memory and learning deficits in APP/PS1 mice through degeneration of locus ceruleus (LC) and noradrenaline deficiency in AD [41]. It has also been reported that abnormal development of LC in *Ear2* deficient mice leads to impaired forebrain clock and affects circadian rhythm [42]. Along with *NR2F6*, we found several other genes of circadian entrainment were up/downregulated in the verbenalin-treated hAECs, such as *GNAS*, *GNBI*, *NKX2-1*, and *RAII*. It has been reported that loss of imprinting of *Gnas* leads to enhancement of nonrapid eye movement (NREM) and complex cognitive processes, and inhibition of rapid eye movement (REM) and REM-linked behaviors [43]. *GNBI* is a G-protein that is differentially expressed on a night/day basis in the pineal gland [44]. The pineal gland plays a vital role in vertebrate chronobiology by converting time into a hormonal signal and melatonin. *NKX2-1* is a TF that activates the transcription of the GnRH receptor and plays a role in enhancing the circadian oscillation [45, 46]. *RAII* is the transcriptional regulator of the circadian clock components. It positively regulates the transcriptional activity of CLOCK, a core component of the circadian clock, through chromatin remodeling by interacting with other proteins in chromatin as well as proteins in the basic transcriptional machinery [47]. Previous studies have already reported the sleep-promoting effect of verbenalin [22]. Synchronizing circadian rhythms may be an inexpensive way to promote healthy aging and delay the onset of neurodegenerative diseases such as AD [48, 49].

Other top downregulated AD-associated genes include *TMEM8A*, *USF2*, PDZ and LIM domain 4 (*PDLIM4*), and *TAF15* (Supplementary Table 3). Lysosomal protein TMEM8A is a hallmark for lysosomal dysfunction and is associated with recessive inherited lysosomal storage disorders [50]. However, there is increasing evidence that lysosomes play a central role in the pathogenesis of common neurodegenerative diseases [51–53]. Nixon et al. identified cathepsins in amyloid- $\beta$  plaques, confirming the broad dysfunction of the lysosomal system in AD [51]. In our study, we found that verbenalin treatment could significantly downregulate the expression of Cathepsin D (*CTSD*; fold change -1.51), a suggested therapeutic target for AD [54]. USFs are essential genes that tie cholesterol metabolism and AD together. USFs regulate genes associated with synaptic plasticity, neuronal survival, and differentiation. Additionally, Isotalo et al. reported an association between USF1 and

AD-related lesions [55]. USF1 regulates lipid metabolism genes, including apolipoprotein E (*APOE*) and amyloid precursor protein (*APP*). *APOE* and *APP* are the most commonly accepted risk genes for early onset of AD, suggesting the involvement of lipid metabolism disorder in AD progression.

TAF15 is an RNA binding protein (RBP) and is reported to colocalize with tau pathology in neurodegenerative diseases [56, 57]. We also found downregulation of heat shock protein gene (heat shock 27kDa protein 1; fold change -1.31) in the verbenalin-treated cells, which is also reported to be associated with pathologic protein aggregation in neurodegenerative diseases [56]. Additionally, significantly upregulated annotation terms by the DEGs in verbenalin-treated hAECs include ‘positive regulation of protein localization (GO: 1904951)’, and ‘positive regulation of protein metabolic process (GO: 0051247)’. Significantly downregulated annotation terms include ‘protein complex binding (GO: 0032403, number of DEGs = 22)’, ‘ribonucleotide binding (GO: 0032553, number of DEGs = 30)’, and ‘cytoskeletal protein binding (GO: 0008092, number of DEGs = 16)’. These findings suggest the regulation of RBPs in verbenalin-treated cells, which may affect pathologic protein aggregation.

Heat maps for relative expression intensity (Figure 3A, 3B, 3C) shows that several AD-associated genes were upregulated in d7 control hAECs compared to d0 control hAECs. Verbenalin treatment could significantly downregulate those AD-associated gene expressions in hAECs. The expression intensities of the genes associated with AD in both verbenalin-treated and untreated (d7 control) hAECs were compared with d0 control hAECs (Figure 3D). The findings suggest that verbenalin treatment had a significant effect on neurodegenerative disease-associated genes compared to untreated hAECs.

As verbenalin treatment could modulate AD-associated genes in hAECs, we further investigated its effect against A $\beta$ -induced neurotoxicity in human neuroblastoma SH-SY5Y cells to confirm its neuroprotective properties (Figures 5 and 6). We found that pretreatment with 20  $\mu$ M of verbenalin for 24 h could significantly reduce the A $\beta$ -induced cell death (Figure 5B), suggesting the neuroprotective potential of verbenalin. Although the underlying molecular mechanism of AD is still unclear, mitochondrial degeneration and oxidative stress are suggested to be the early triggering factors of AD pathophysiology [58, 59]. Defective mitochondria inhibit the production of ATP and increase the production of ROS. Accumulation of ROS eventually induces oxidative damage. Thus,

pharmacological inhibition of ROS generation and activation of ATP production has been considered as feasible therapeutic strategies for AD. We found that verbenalin could significantly ameliorate the A $\beta$ -induced decline of ATP levels (Figure 5C) and attenuate the A $\beta$ -induced ROS generation (Figure 5D) in SH-SY5Y cells. We also investigated how verbenalin treatment could modulate the expressions of *EGFR*, *VEGF*, and *NRG1* in A $\beta$ -induced SH-SY5Y cells. Increased EGFR activity has been linked to the A $\beta$ -induced memory loss, a hallmark of AD progression. Wang et al., have reported that EGFR inhibitors are capable of rescuing the A $\beta$ -induced memory loss in both transgenic fruit fly and transgenic mouse models and have suggested that inhibition of A $\beta$ -induced EGFR activation might be an effective way to treat A $\beta$ -induced memory loss in AD. We found that verbenalin treatment could downregulate A $\beta$ -induced EGFR expression. We also found that verbenalin could significantly upregulate NRG1 expression in A $\beta$ -induced SH-SY5Y cells. NRG1 is widely expressed in the adult human brain [60]. Although it is not clear yet how A $\beta$  aggregation affects NRG1 expression in the AD brain, it is evident that NRG1 has therapeutic potential for AD by inducing neurogenesis, improving cognitive deficits, and restoring synaptic plasticity with [61] or without [63] affecting A $\beta$  level. The angiogenic factor VEGF is implicated in pathological angiogenesis in the AD brain [39, 40]; however, it is reported that A $\beta$  antagonizes VEGF activity both *in vitro* and *in vivo* in a transgenic mouse model of AD [62]. The exogenous addition of VEGF can partially rescue the anti-angiogenic effect of A $\beta$  peptides *in vitro* [62]. Another interesting study by Garcia and colleagues [63] showed that transplantation of VEGF overexpressing bone marrow mesenchymal stem cells in the hippocampus of AD transgenic mice could promote neovascularization, and reduce the number of A $\beta$  plaques. In our study, we found that verbenalin treatment significantly reduced *VEGF* expression in hAECs (Figure 4A) but increased its expression in A $\beta$ -induced SH-SY5Y cells. Therefore, the effect of verbenalin on VEGF requires to be evaluated in *in vivo* condition.

One of the advantages of plant-derived natural compounds is that they contain multiple agents that can target multiple pathologies simultaneously, therefore, are found more efficacious than the traditional drugs when faced with complex disease conditions, such as AD. Our study suggests that verbenalin treatment in hAECs may improve its therapeutic potential to AD through modulating the gene expression related to neurometabolic aging, lysosomal dysfunction, pathological angiogenesis, pathological protein aggregation, and circadian rhythms. We have also found that verbenalin could significantly reduce cell death,

ameliorate the decline of ATP levels, inhibit the ROS generation and *EGFR* expression, and upregulate *NRG1* expression in A $\beta$ -induced SH-SY5Y cells. As verbenalin treatment could significantly regulate AD-associated genes in hAECs compared to untreated hAECs, it may provide new treatment modalities for neurodegenerative diseases, such as transplantation of verbenalin-treated hAECs, or combination use of hAEC transplantation/systemic administration and oral administration of verbenalin. Future evidence-studies are required to evaluate the afore-mentioned neuroprotective properties of verbenalin systematically.

In conclusion, given the increase in AD prevalence, diverse studies are needed to explore the therapeutic potentials of nature-derived compounds. Even small measurable differences in cognition, behavior, and functioning may become clinically significant to prevent, halt, or cure progressive neurodegenerative diseases. Pretreatment of hAECs or other adult stem cells in the presence of a certain plant extract or its pharmacologically active substance can open a new horizon in regenerative medicine in AD.

## MATERIALS AND METHODS

### Amnion epithelial cells extraction and culture

The detailed methodology has been explained elsewhere [64]. Briefly, AECs were isolated from the delivered term placenta of the mothers who underwent cesarean delivery. The amnion was separated from the chorion manually and was washed with 200 mL of Hank's Basic Salt Solution – Calcium and Magnesium Free (CMF-HBSS) and then was cut into smaller pieces using surgical scissors. AECs were maintained in Placenta Epithelial Cell Basal Medium (PromoCell, Cat. # C-26140). The medium was changed every 2-4 days. To subculture AECs, the plates were first washed twice with 10 mL of PBS, and then 3 mL of pre-digestion buffer (pre-warmed to 37°C) was added to the plate. After incubation at 37°C for 5 minutes, five mL of 0.05% (w/v) trypsin-EDTA (pre-warmed to 37°C) was added to the plate and incubated at 37°C for 10 minutes. Five mL of Dulbecco's Modified Eagle Medium (DMEM) was added to stop the reaction. The cell suspension was then centrifuged at 200 RPM for 4 minutes at 4°C twice. After centrifuge, the supernatant was discarded each time, and the cells were suspended in the placental basal medium.

### Preparation of 3D culture plates, spheroid formation, and compound supplement

We used a 3D culture plate (Elplasia™, Kuraray Co., Ltd., Cat # RB 500 400 NA 24) for the study. Lipidure™ (NOF Corporation, Cat. # CMS206; 400  $\mu$ L)

solution was placed into each well of the 3D plate at the concentration of 50 mg in 10 mL absolute ethanol. After two minutes, the Lipidure™ solution was aspirated out, and the plate was dried for 3 hours. Then 400  $\mu$ L of PBS was placed in each well. The plate was centrifuged at 2000 g for 15 minutes at room temperature. The PBS was then discarded, and the wells were washed twice with 400  $\mu$ L of PBS. The plates were then stored in the cell culture incubator until use.

Spheroids were formed by seeding  $1 \times 10^6$  AECs in Placenta Basal Epithelial Cell Medium into each well of the 24-well plate. The initial culture was maintained for 24 hours. Control samples for d 0 were collected before adding the treatment. For the treatment samples, the medium was changed with 20  $\mu$ M of verbenalin (Sigma-Aldrich, Japan) every 48 hours for three times. Control samples were maintained in the Placental medium, which was also changed in every 48 hours. Finally, the treatment and control samples were collected from a one-week culture.

### RNA extraction and quantification

RNA was extracted using Isogen (Nippon Gene Co. Ltd., Toyama, Japan) kit following the manufacturer's guide. NanoDrop 2000 spectrophotometer (Thermo Scientific, Wilmington, DE, USA) was used to quantify the integrity of RNA.

### Affymetrix microarray gene expression

We conducted Affymetrix microarray gene expression profiling using GeneChip® 3' Expression Arrays and 3' IVT PLUS Reagent Kit (Affymetrix Inc., Santa Clara, CA, USA). We used 250 ng of total RNA from each sample to generate amplified and biotinylated complementary RNA (cRNA) from poly (A) RNA in a total RNA sample following the users' manual. Human Genome U219 array strips (HG-U219) were hybridized for 16 hours in a 45°C incubator, washed and stained. Imaging was conducted in the GeneAtlas Fluidics and Imaging Station. Each HG-U219 array strip is comprised of more than 530,000 probes, which cover approximately 36,000 transcripts and variants and represent more than 20,000 unique genes.

### Microarray data processing and analysis

Expression Console Software (provided by the Affymetrix) was used to normalize the raw data following the robust multichip average (RMA) algorithm (<http://www.affymetrix.com>). Subsequent analysis of the gene expression data was carried out in the freely available Transcriptome Analysis Console (TAC) version 4 (Thermofisher Inc.). In this present study, we have

considered both fold changes and variability of gene expression for the identification of DEGs. Raw fold change between two experimental conditions does not take the variance of gene expression among the replicates into account. Therefore, it does not provide statistical confidence that the genes will show similar fold-change threshold in future experiments. Therefore, we defined DEGs as the genes that satisfy both *p*-value <0.05 (one-way between-subjects ANOVA) and fold-change (in linear space) > 1.1 criteria simultaneously. MSigDB of GSEA was used to determine whether a priori-defined set of genes shows statistically significant and concordant differences between two biological states, i.e., verbenalin-treated versus non-treated control (<https://software.broadinstitute.org/gsea/index.jsp>) [65, 66]. MSigDB emphasizes a genomic, unbiased approach to define the gene sets, which are curated from published expression profiles and allows researchers to evaluate microarray data at the level of gene sets, which tend to be more reproducible and more interpretable. Gene annotation, tissue expression, and pathway analysis for the DEGs were conducted using an online data mining tool DAVID ver. 6.8 [67, 68]. Heat maps were generated using visualization software Morpheus (<https://software.broadinstitute.org/morpheus>). All data generated or analyzed during this study are included in this published article and its supplementary files. Microarray data are deposited in the Gene Expression Omnibus (GEO) under Accession Number: GSE137061 (<https://www.ncbi.nlm.nih.gov/geo/info/linking.html>).

### Real-time PCR

To synthesize cDNA from total RNA, the SuperScript III reverse transcriptase kit (Invitrogen, Carlsbad, CA, USA) was used. Primers and probes for human vascular endothelial growth factor B (*VEGFB*) (Hs00173634\_m1), human epidermal growth factor receptor (*EGFR*) (Hs01076090\_m1), human neuregulin 1 (*NRG1*) (Hs01101538\_m1) and human glyceraldehyde-3-phosphate dehydrogenase (*GAPDH*) (Hs02786624\_g1) were purchased from Applied Biosystems (Foster City, CA, USA). The gene expression was normalized to *GAPDH* expression. The real-time PCR amplification and product detection were performed with a 7500 Fast Real-time PCR system (Applied Biosystems) using TaqMan Gene Expression Master Mix (Applied Biosystems). Each reaction was run in triplicate, and data were analyzed using the  $\Delta\Delta C_t$  method.

### Cell cytotoxicity test

The SH-SY5Y cells (American Type Culture Collection (ATCC), Manassas, VA, USA) and hAECs were seeded in 96-well plates at a density of  $2.0 \times 10^5$  cells/ml and  $1.0 \times 10^5$  cells/ml respectively and were incubated for 24 h.

The following day, the cells were treated with various concentrations (1, 5, 10, 20, and 40  $\mu$ M) of verbenalin for 72 h. After the treatment, the MTT (Dojindo Laboratories, Kumamoto, Japan) solution was added to each well (10  $\mu$ l/well) and was incubated at 37°C for 24 h. Then, the generated formazan crystal was dissolved with 100  $\mu$ l of 10% Sodium Dodecyl Sulfate (SDS) (Nippon Gene, Tokyo, Japan) in each well, and was incubated overnight at 37°C. After that, the absorbance was measured at 570 nm using a microplate reader (Power Scan HT, BioTEK Japan Inc.). The values were normalized to the value of the medium and were calculated as the percentage (%) of control.

### *In vitro* neuroprotection assay

The human neuroblastoma SH-SY5Y cell line was obtained from American Type Culture Collection (ATCC) (Manassas, VA, USA). The cells were maintained in a mixture of 1:1 (v/v) of Dulbecco's modified eagle medium (DMEM), and nutrient mixture F-12 (Ham) supplemented with 15% heat-inactivated FBS (Gibco, Japan), 1% MEM non-essential amino acids solution (Biological Industries, Beit Haemek, Israel) and 1% penicillin (5000  $\mu$ g/mL)–streptomycin (5000 IU/mL) solution (Lonza, Basel, Switzerland) on 100 mm culture dish (Falcon, Corning, NY, USA) or 96-well culture plates (Falcon) at 37 °C in a 95% humidified air–5% CO<sub>2</sub> incubator. A serum-free Eagle's minimum essential medium (Opti-MEM) (Gibco, Japan) was used to culture the cells for the neuroprotection assay.

The neuroprotective activity was determined by the MTT reduction assay. SH-SY5Y cells were seeded at a density of  $2.0 \times 10^4$  cells/well in the 96-well culture plates and incubated for 24 h. The cells were pre-incubated with 20  $\mu$ M verbenalin in Opti-MEM for 24 h and then were subjected to treatment with 5  $\mu$ M A $\beta$  and the sample for 24 h. The treated medium was replaced with 100  $\mu$ L of Opti-MEM in the absence of verbenalin and A $\beta$ . Subsequently, 10  $\mu$ L of MTT (Dojindo Laboratories, Kumamoto, Japan) dissolved in PBS (–) at 5 mg/mL was added into the medium. After overnight incubation at 37 °C, 100  $\mu$ L of 10% SDS (w/v) was added and incubated until the formazan product dissolved. The absorbance was measured at the wavelength of 570 nm with a Varioskan Lux multimode microplate reader (Thermo Fisher, Waltham, MA, USA). The proliferation of SH-SY5Y cells was shown by the percentage of the A $\beta$ -treated group.

### ATP assay

SH-SY5Y cells were seeded at a density of  $2.0 \times 10^4$  cells/well in the 96-well culture plates and incubated for

24 h. The cells were then pre-incubated with 20  $\mu$ M verbenalin in culture medium for 24 h. After 24 h incubation, the medium was replaced with 100  $\mu$ l of culture medium containing 5  $\mu$ M A $\beta$  and 20  $\mu$ M verbenalin. After 24 h, 100  $\mu$ l of Cellular ATP measurement reagent (CA2-100, TOYO B-NET, Tokyo, Japan) was added and stirred for 1 min on a plate shaker. Then 150  $\mu$ l of the suspension was transferred to a white plate and was let stand for 10 min in a luminometer set at 23 °C. The luminescence was measured with a Varioskan Lux multimode microplate reader.

### Cellular ROS assay

Cellular ROS production was measured using OxiSelect Intracellular ROS Assay Kit (Green Fluorescence, STA-342, Cell Biolabs, San Diego, CA, USA) according to the manufacturer's instructions. Briefly, SH-SY5Y cells were seeded at a density of  $2.0 \times 10^4$  cells/well in the 96-well culture plates and were incubated for 24 h. The cells were then pre-incubated with 20  $\mu$ M verbenalin in culture medium for 24 h. The culture medium was later replaced with 100  $\mu$ l of 0.1x DCFH-DA and the cells were incubated for 1 h at 37 °C. Then 0.1x DCFH-DA was replaced with 100  $\mu$ l of Opti-MEM containing 5  $\mu$ M of A $\beta$  and 20 of  $\mu$ M verbenalin. The cells were incubated at 37 °C for 24 h. The sample-containing medium was replaced with 200  $\mu$ l of  $1 \times$  Cell Lysis Buffer, shaken for 1 min on a plate shaker, and incubated for 5 min at room temperature (24 °C). Finally, 150  $\mu$ l of cell lysate was transferred to a black plate. Fluorescence wavelength was detected at 480nm excitation / 530nm emission with a Varioskan Lux multimode microplate reader.

### Protein isolation and detection

SH-SY5Y cells were seeded at a density of  $6.0 \times 10^5$  cells / 3ml / well in a 6-well plate. After 24 h of incubation at 37 °C, the cells were pre-incubated in 3 ml of Opti-MEM medium containing 20  $\mu$ M Verbenalin for another 24 h. The medium was then replaced with 3 ml of Opti-MEM medium containing 5  $\mu$ M A $\beta$  and 20  $\mu$ M verbenalin. The medium was collected after 72 h. commercially available enzyme-linked immunosorbent assay (ELISA) kits were used to measure VEGF (ab100662), NRG1 (ab100614), and EGFR (ab100505) according to the manufacturer's instructions (Abcam, Cambridge, UK). The absorbance was measured at 450 nm on a Varioskan Lux multimode microplate reader.

### Statistical analysis

Data were analyzed using GraphPad Prism (version 8.0, GraphPad Software Inc., San Diego, CA) and SPSS ver.26 (Armonk, NY: IBM Corp). Data were expressed

as the means  $\pm$  standard error of the mean (SEM) unless otherwise mentioned. One-way analysis of variance (ANOVA) followed by Dunnett's multiple comparisons test for linear distribution and Mann-Whitney U test for nonlinear distribution was carried out for the comparisons between treatment groups. Differences were considered statistically significant at the value of  $P < 0.05$ . Graphs were prepared using OriginPro software (OriginPro 2020, OriginLab Corporation, Northampton, MA, USA).

### Ethics approval

The protocol was reviewed and approved by the Ethical Review Committee of the University of Tsukuba. Informed written consent was obtained from the mothers who donated the placenta after delivery.

### Abbreviations

AD: Alzheimer's disease; A $\beta$ : amyloid-beta; DEGs: differentially expressed genes; EGFR: epidermal growth factor; GO: Gene Ontology; GSEA: gene set enrichment analysis; hAECs: human amnion epithelial cells; NRG: neuregulin; VEGF: vascular endothelial growth factor.

### AUTHOR CONTRIBUTIONS

FF: investigation, methodology, data curation, formal analysis, visualization, writing - original draft; SK: investigation, methodology, data curation, formal analysis, validation, visualization; KS: investigation, methodology, validation; YU: investigation and data curation; NO and HI: conceptualization, funding acquisition, project administration; NO, YWZ and HI: resources, supervision, writing - review and editing. All the authors made substantial contributions to this article and approved the final article.

### CONFLICTS OF INTEREST

The authors declare no conflicts of interest.

### FUNDING

This work was supported by the JST-JICA - Japan Science and Technology Agency (JST) and the Japan International Cooperation Agency (JICA) (SATREPS) and JST-Center of Innovation (COI) project.

### REFERENCES

1. McKhann G, Drachman D, Folstein M, Katzman R, Price D, Stadlan EM. Clinical diagnosis of Alzheimer's disease: report of the NINCDS-ADRDA Work Group

- under the auspices of Department of Health and Human Services Task Force on Alzheimer's Disease. *Neurology*. 1984; 34:939–44.  
<https://doi.org/10.1212/WNL.34.7.939>  
PMID:[6610841](https://pubmed.ncbi.nlm.nih.gov/6610841/)
2. Kumar A, Singh A, Ekavali. A review on Alzheimer's disease pathophysiology and its management: an update. *Pharmacol Rep*. 2015; 67:195–203.  
<https://doi.org/10.1016/j.pharep.2014.09.004>  
PMID:[25712639](https://pubmed.ncbi.nlm.nih.gov/25712639/)
  3. Thies W, Bleiler L. Alzheimer's disease facts and figures. *Alzheimers Dement*. 2011; 2011:7.
  4. Lane RF, Dacks PA, Shineman DW, Fillit HM. Diverse therapeutic targets and biomarkers for Alzheimer's disease and related dementias: report on the Alzheimer's Drug Discovery Foundation 2012 International Conference on Alzheimer's Drug Discovery. *Alzheimers Res Ther*. 2013; 5:5.  
<https://doi.org/10.1186/alzrt159>  
PMID:[23374760](https://pubmed.ncbi.nlm.nih.gov/23374760/)
  5. Felsenstein KM, Candelario KM, Steindler DA, Borchelt DR. Regenerative medicine in Alzheimer's disease. *Transl Res*. 2014; 163:432–38.  
<https://doi.org/10.1016/j.trsl.2013.11.001>  
PMID:[24286919](https://pubmed.ncbi.nlm.nih.gov/24286919/)
  6. Fang Y, Gao T, Zhang B, Pu J. Recent Advances: Decoding Alzheimer's Disease With Stem Cells. *Front Aging Neurosci*. 2018; 10:77.  
<https://doi.org/10.3389/fnagi.2018.00077>  
PMID:[29623038](https://pubmed.ncbi.nlm.nih.gov/29623038/)
  7. Miki T. Amnion-derived stem cells: in quest of clinical applications. *Stem Cell Res Ther*. 2011; 2:25.  
<https://doi.org/10.1186/scrt66>  
PMID:[21596003](https://pubmed.ncbi.nlm.nih.gov/21596003/)
  8. Xue S, Chen C, Dong W, Hui G, Liu T, Guo L. Therapeutic effects of human amniotic epithelial cell transplantation on double-transgenic mice co-expressing APP<sup>swe</sup> and PS1 $\Delta$ E9-deleted genes. *Sci China Life Sci*. 2012; 55:132–40.  
<https://doi.org/10.1007/s11427-012-4283-1>  
PMID:[22415684](https://pubmed.ncbi.nlm.nih.gov/22415684/)
  9. Castillo-Melendez M, Yawno T, Jenkin G, Miller SL. Stem cell therapy to protect and repair the developing brain: a review of mechanisms of action of cord blood and amnion epithelial derived cells. *Front Neurosci*. 2013; 7:194.  
<https://doi.org/10.3389/fnins.2013.00194>  
PMID:[24167471](https://pubmed.ncbi.nlm.nih.gov/24167471/)
  10. Di Germanio C, Bernier M, de Cabo R, Barboni B. Amniotic Epithelial Cells: A New Tool to Combat Aging and Age-Related Diseases? *Front Cell Dev Biol*. 2016; 4:135–135.  
<https://doi.org/10.3389/fcell.2016.00135>  
PMID:[27921031](https://pubmed.ncbi.nlm.nih.gov/27921031/)
  11. Xu H, Zhang J, Tsang KS, Yang H, Gao WQ. Therapeutic Potential of Human Amniotic Epithelial Cells on Injuries and Disorders in the Central Nervous System. *Stem Cells Int*. 2019; 2019:5432301.  
<https://doi.org/10.1155/2019/5432301>  
PMID:[31827529](https://pubmed.ncbi.nlm.nih.gov/31827529/)
  12. Kornicka K, Kocherova I, Marycz K. The effects of chosen plant extracts and compounds on mesenchymal stem cells—a bridge between molecular nutrition and regenerative medicine—concise review. *Phytother Res*. 2017; 31:947–58.  
<https://doi.org/10.1002/ptr.5812>  
PMID:[28439998](https://pubmed.ncbi.nlm.nih.gov/28439998/)
  13. Udagama PV, Udalamaththa V. Application of Herbal Medicine as Proliferation and Differentiation Effectors of Human Stem Cells. *Herbal Medicine*. IntechOpen. 2018.  
<https://doi.org/10.5772/intechopen.72711>
  14. Udalamaththa VL, Jayasinghe CD, Udagama PV. Potential role of herbal remedies in stem cell therapy: proliferation and differentiation of human mesenchymal stromal cells. *Stem Cell Res Ther*. 2016; 7:110.  
<https://doi.org/10.1186/s13287-016-0366-4>  
PMID:[27515026](https://pubmed.ncbi.nlm.nih.gov/27515026/)
  15. Esneault E, Pacary E, Eddi D, Freret T, Tixier E, Toutain J, Touzani O, Schumann-Bard P, Petit E, Roussel S, Bernaudin M. Combined therapeutic strategy using erythropoietin and mesenchymal stem cells potentiates neurogenesis after transient focal cerebral ischemia in rats. *J Cereb Blood Flow Metab*. 2008; 28:1552–63.  
<https://doi.org/10.1038/jcbfm.2008.40>  
PMID:[18478023](https://pubmed.ncbi.nlm.nih.gov/18478023/)
  16. Marutle A, Ohmitsu M, Nilbratt M, Greig NH, Nordberg A, Sugaya K. Modulation of human neural stem cell differentiation in Alzheimer (APP23) transgenic mice by phenserine. *Proc Natl Acad Sci USA*. 2007; 104:12506–11.  
<https://doi.org/10.1073/pnas.0705346104>  
PMID:[17640880](https://pubmed.ncbi.nlm.nih.gov/17640880/)
  17. Mecocci P, Tinarelli C, Schulz RJ, Polidori MC. Nutraceuticals in cognitive impairment and Alzheimer's disease. *Front Pharmacol*. 2014; 5:147.  
<https://doi.org/10.3389/fphar.2014.00147>  
PMID:[25002849](https://pubmed.ncbi.nlm.nih.gov/25002849/)
  18. Rao RV, Descamps O, John V, Bredesen DE. Ayurvedic medicinal plants for Alzheimer's disease: a review. *Alzheimers Res Ther*. 2012; 4:22.  
<https://doi.org/10.1186/alzrt125> PMID:[22747839](https://pubmed.ncbi.nlm.nih.gov/22747839/)

19. Bahramsoltani R, Rostamiasrabadi P, Shahpiri Z, Marques AM, Rahimi R, Farzaei MH. Aloysia citrodora Paláu (Lemon verbena): A review of phytochemistry and pharmacology. *J Ethnopharmacol*. 2018; 222:34–51.  
<https://doi.org/10.1016/j.jep.2018.04.021>  
PMID:29698776
20. Bilia AR, Giomi M, Innocenti M, Gallori S, Vincieri FF. HPLC-DAD-ESI-MS analysis of the constituents of aqueous preparations of verbena and lemon verbena and evaluation of the antioxidant activity. *J Pharm Biomed Anal*. 2008; 46:463–70.  
<https://doi.org/10.1016/j.jpba.2007.11.007>  
PMID:18155378
21. Schönbichler SA, Bittner LK, Pallua JD, Popp M, Abel G, Bonn GK, Huck CW. Simultaneous quantification of verbenalin and verbascoside in *Verbena officinalis* by ATR-IR and NIR spectroscopy. *J Pharm Biomed Anal*. 2013; 84:97–102.  
<https://doi.org/10.1016/j.jpba.2013.04.038>  
PMID:23810849
22. Makino Y, Kondo S, Nishimura Y, Tsukamoto Y, Huang ZL, Urade Y. Hastatoside and verbenalin are sleep-promoting components in *Verbena officinalis*. *Sleep Biol Rhythms*. 2009; 7:211–17.  
<https://doi.org/10.1111/j.1479-8425.2009.00405.x>
23. Cao L, Miao M, Qiao J, Bai M, Li R. The protective role of verbenalin in rat model of focal cerebral ischemia reperfusion. *Saudi J Biol Sci*. 2018; 25:1170–77.  
<https://doi.org/10.1016/j.sjbs.2017.10.005>  
PMID:30174518
24. Sabti M, Sasaki K, Gadhi C, Isoda H. Elucidation of the Molecular Mechanism Underlying *Lippia citriodora*(Lim.)-Induced Relaxation and Anti-Depression. *Int J Mol Sci*. 2019; 20:3556.  
<https://doi.org/10.3390/ijms20143556>  
PMID:31330819
25. Blalock EM, Geddes JW, Chen KC, Porter NM, Markesbery WR, Landfield PW. Incipient Alzheimer's disease: microarray correlation analyses reveal major transcriptional and tumor suppressor responses. *Proc Natl Acad Sci USA*. 2004; 101:2173–78.  
<https://doi.org/10.1073/pnas.0308512100>  
PMID:14769913
26. Kim S, Webster MJ. Correlation analysis between genome-wide expression profiles and cytoarchitectural abnormalities in the prefrontal cortex of psychiatric disorders. *Mol Psychiatry*. 2010; 15:326–36.  
<https://doi.org/10.1038/mp.2008.99>  
PMID:18762803
27. Grupe A, Li Y, Rowland C, Nowotny P, Hinrichs AL, Smemo S, Kauwe JS, Maxwell TJ, Cherny S, Doil L, Tacey K, van Luchene R, Myers A, et al. A scan of chromosome 10 identifies a novel locus showing strong association with late-onset Alzheimer disease. *Am J Hum Genet*. 2006; 78:78–88.  
<https://doi.org/10.1086/498851> PMID:16385451
28. Oláh J, Vincze O, Virók D, Simon D, Bozsó Z, Tőkési N, Horváth I, Hlavanda E, Kovács J, Magyar A, Szűcs M, Orosz F, Penke B, Ovádi J. Interactions of pathological hallmark proteins: tubulin polymerization promoting protein/p25, beta-amyloid, and alpha-synuclein. *J Biol Chem*. 2011; 286:34088–100.  
<https://doi.org/10.1074/jbc.M111.243907>  
PMID:21832049
29. Garcez ML, Falchetti AC, Mina F, Budni J. Alzheimer's Disease associated with Psychiatric Comorbidities. *An Acad Bras Cienc*. 2015 (2 Suppl); 87:1461–73.  
<https://doi.org/10.1590/0001-3765201520140716>  
PMID:26312426
30. Sanluis-Verdes A, Sanluis-Verdes N, Manso-Revilla MJ, Castro-Castro AM, Pombo-Otero J, Fraga-Mariño M, Sanchez-Ibañez J, Doménech N, Rendal-Vázquez ME. Tissue engineering for neurodegenerative diseases using human amniotic membrane and umbilical cord. *Cell Tissue Bank*. 2017; 18:1–15.  
<https://doi.org/10.1007/s10561-016-9595-0>  
PMID:27830445
31. Jiao H, Shi K, Zhang W, Yang L, Yang L, Guan F, Yang B. Therapeutic potential of human amniotic membrane-derived mesenchymal stem cells in APP transgenic mice. *Oncol Lett*. 2016; 12:1877–83.  
<https://doi.org/10.3892/ol.2016.4857> PMID:27588134
32. Siddiqui S, Fang M, Ni B, Lu D, Martin B, Maudsley S. Central role of the EGF receptor in neurometabolic aging. *Int J Endocrinol*. 2012; 2012:739428.  
<https://doi.org/10.1155/2012/739428>  
PMID:22754566
33. Wang L, Chiang HC, Wu W, Liang B, Xie Z, Yao X, Ma W, Du S, Zhong Y. Epidermal growth factor receptor is a preferred target for treating amyloid- $\beta$ -induced memory loss. *Proc Natl Acad Sci USA*. 2012; 109:16743–48.  
<https://doi.org/10.1073/pnas.1208011109>  
PMID:23019586
34. Ryu J, Hong BH, Kim YJ, Yang EJ, Choi M, Kim H, Ahn S, Baik TK, Woo RS, Kim HS. Neuregulin-1 attenuates cognitive function impairments in a transgenic mouse model of Alzheimer's disease. *Cell Death Dis*. 2016; 7:e2117.  
<https://doi.org/10.1038/cddis.2016.30>  
PMID:26913607
35. Mei L, Nave KA. Neuregulin-ERBB signaling in the nervous system and neuropsychiatric diseases. *Neuron*. 2014; 83:27–49.



- <https://doi.org/10.1016/j.neuron.2014.06.007>  
PMID:24991953
36. Prudnikova TY, Rawat SJ, Chernoff J. Molecular pathways: targeting the kinase effectors of RHO-family GTPases. *Clin Cancer Res*. 2015; 21:24–29.  
<https://doi.org/10.1158/1078-0432.CCR-14-0827>  
PMID:25336694
37. O-charoenrat P, Rhys-Evans P, Modjtahedi H, Eccles SA. Vascular endothelial growth factor family members are differentially regulated by c-erbB signaling in head and neck squamous carcinoma cells. *Clin Exp Metastasis*. 2000; 18:155–61.  
<https://doi.org/10.1023/A:1006764100867>  
PMID:11235991
38. Jefferies WA, Price KA, Biron KE, Fenninger F, Pfeifer CG, Dickstein DL. Adjusting the compass: new insights into the role of angiogenesis in Alzheimer’s disease. *Alzheimers Res Ther*. 2013; 5:64–64.  
<https://doi.org/10.1186/alzrt230>  
PMID:24351529
39. Biron KE, Dickstein DL, Gopaul R, Jefferies WA. Amyloid triggers extensive cerebral angiogenesis causing blood brain barrier permeability and hypervascularity in Alzheimer’s disease. *PLoS One*. 2011; 6:e23789–23789.  
<https://doi.org/10.1371/journal.pone.0023789>  
PMID:21909359
40. Singh C, Pfeifer CG, Jefferies WA. Pathogenic Angiogenic Mechanisms in Alzheimer’s Disease. *Signaling Mechanisms and Targeted Therapy*. IntechOpen. 2017.  
<https://doi.org/10.5772/66403>
41. Kummer MP, Hammerschmidt T, Martinez A, Terwel D, Eichele G, Witten A, Figura S, Stoll M, Schwartz S, Pape HC, Schultze JL, Weinshenker D, Heneka MT, Urban I. Ear2 deletion causes early memory and learning deficits in APP/PS1 mice. *J Neurosci*. 2014; 34:8845–54.  
<https://doi.org/10.1523/JNEUROSCI.4027-13.2014>  
PMID:24966384
42. Warnecke M, Oster H, Revelli JP, Alvarez-Bolado G, Eichele G. Abnormal development of the locus coeruleus in Ear2(Nr2f6)-deficient mice impairs the functionality of the forebrain clock and affects nociception. *Genes Dev*. 2005; 19:614–25.  
<https://doi.org/10.1101/gad.317905>  
PMID:15741322
43. Lassi G, Ball ST, Maggi S, Colonna G, Nieuw T, Cero C, Bartolomucci A, Peters J, Tucci V. Loss of Gnas imprinting differentially affects REM/NREM sleep and cognition in mice. *PLoS Genet*. 2012; 8:e1002706.  
<https://doi.org/10.1371/journal.pgen.1002706>  
PMID:22589743
44. Bailey MJ, Coon SL, Carter DA, Humphries A, Kim JS, Shi Q, Gaildrat P, Morin F, Ganguly S, Hogenesch JB, Weller JL, Rath MF, Møller M, et al. Night/day changes in pineal expression of >600 genes: central role of adrenergic/cAMP signaling. *J Biol Chem*. 2009; 284:7606–22.  
<https://doi.org/10.1074/jbc.M808394200>  
PMID:19103603
45. Mieda M, Hasegawa E, Kessar N, Sakurai T. Fine-Tuning Circadian Rhythms: The Importance of *Bmal1* Expression in the Ventral Forebrain. *Front Neurosci*. 2017; 11:55–55.  
<https://doi.org/10.3389/fnins.2017.00055>  
PMID:28232786
46. Malt EA, Juhasz K, Malt UF, Naumann T. A Role for the Transcription Factor Nk2 Homeobox 1 in Schizophrenia: Convergent Evidence from Animal and Human Studies. *Front Behav Neurosci*. 2016; 10:59–59.  
<https://doi.org/10.3389/fnbeh.2016.00059>  
PMID:27064909
47. Williams SR, Zies D, Mullegama SV, Grotewiel MS, Elsea SH. Smith-Magenis syndrome results in disruption of CLOCK gene transcription and reveals an integral role for RAI1 in the maintenance of circadian rhythmicity. *Am J Hum Genet*. 2012; 90:941–49.  
<https://doi.org/10.1016/j.ajhg.2012.04.013>  
PMID:22578325
48. Chauhan R, Chen KF, Kent BA, Crowther DC. Central and peripheral circadian clocks and their role in Alzheimer’s disease. *Dis Model Mech*. 2017; 10:1187–99.  
<https://doi.org/10.1242/dmm.030627>  
PMID:28993311
49. Kent BA. Synchronizing an aging brain: can entraining circadian clocks by food slow Alzheimer’s disease? *Front Aging Neurosci*. 2014; 6:234.  
<https://doi.org/10.3389/fnagi.2014.00234>  
PMID:25225484
50. Palmieri M, Impey S, Kang H, di Ronza A, Pelz C, Sardiello M, Ballabio A. Characterization of the CLEAR network reveals an integrated control of cellular clearance pathways. *Hum Mol Genet*. 2011; 20:3852–66.  
<https://doi.org/10.1093/hmg/ddr306> PMID:21752829
51. Nixon RA, Cataldo AM. Lysosomal system pathways: genes to neurodegeneration in Alzheimer’s disease. *J Alzheimers Dis*. 2006 (3 Suppl); 9:277–89.  
<https://doi.org/10.3233/JAD-2006-9S331>  
PMID:16914867
52. Schneider L, Zhang J. Lysosomal function in macromolecular homeostasis and bioenergetics in Parkinson’s disease. *Mol Neurodegener*. 2010; 5:14.  
<https://doi.org/10.1186/1750-1326-5-14>

PMID:[20388210](#)

53. Zuccato C, Valenza M, Cattaneo E. Molecular mechanisms and potential therapeutical targets in Huntington's disease. *Physiol Rev.* 2010; 90:905–81. <https://doi.org/10.1152/physrev.00041.2009> PMID:[20664076](#)
54. Di Domenico F, Tramutola A, Perluigi M. Cathepsin D as a therapeutic target in Alzheimer's disease. *Expert Opin Ther Targets.* 2016; 20:1393–95. <https://doi.org/10.1080/14728222.2016.1252334> PMID:[27805462](#)
55. Isotalo K, Kok EH, Luoto TM, Haikonen S, Haapasalo H, Lehtimäki T, Karhunen PJ. Upstream transcription factor 1 (USF1) polymorphisms associate with Alzheimer's disease-related neuropathological lesions: Tampere Autopsy Study. *Brain Pathol.* 2012; 22:765–75. <https://doi.org/10.1111/j.1750-3639.2012.00586.x> PMID:[22390463](#)
56. Maziuk B, Ballance HI, Wolozin B. Dysregulation of RNA Binding Protein Aggregation in Neurodegenerative Disorders. *Front Mol Neurosci.* 2017; 10:89–89. <https://doi.org/10.3389/fnmol.2017.00089> PMID:[28420962](#)
57. Maziuk BF, Apicco DJ, Cruz AL, Jiang L, Ash PE, da Rocha EL, Zhang C, Yu WH, Leszyk J, Abisambra JF, Li H, Wolozin B. RNA binding proteins co-localize with small tau inclusions in tauopathy. *Acta Neuropathol Commun.* 2018; 6:71. <https://doi.org/10.1186/s40478-018-0574-5> PMID:[30068389](#)
58. Guo C, Sun L, Chen X, Zhang D. Oxidative stress, mitochondrial damage and neurodegenerative diseases. *Neural Regen Res.* 2013; 8:2003–14. <https://doi.org/10.3969/j.issn.1673-5374.2013.21.009> PMID:[25206509](#)
59. Moreira PI, Carvalho C, Zhu X, Smith MA, Perry G. Mitochondrial dysfunction is a trigger of Alzheimer's disease pathophysiology. *Biochim Biophys Acta.* 2010; 1802:2–10. <https://doi.org/10.1016/j.bbadis.2009.10.006> PMID:[19853658](#)
60. Law AJ, Shannon Weickert C, Hyde TM, Kleinman JE, Harrison PJ. Neuregulin-1 (NRG-1) mRNA and protein in the adult human brain. *Neuroscience.* 2004; 127:125–36. <https://doi.org/10.1016/j.neuroscience.2004.04.026> PMID:[15219675](#)
61. Xu J, de Winter F, Farrokhi C, Rockenstein E, Mante M, Adame A, Cook J, Jin X, Masliah E, Lee KF. Neuregulin 1 improves cognitive deficits and neuropathology in an Alzheimer's disease model. *Sci Rep.* 2016; 6:31692. <https://doi.org/10.1038/srep31692> PMID:[27558862](#)
62. Patel NS, Mathura VS, Bachmeier C, Beaulieu-Abdelahad D, Laporte V, Weeks O, Mullan M, Paris D. Alzheimer's  $\beta$ -amyloid peptide blocks vascular endothelial growth factor mediated signaling via direct interaction with VEGFR-2. *J Neurochem.* 2010; 112:66–76. <https://doi.org/10.1111/j.1471-4159.2009.06426.x> PMID:[19818105](#)
63. Garcia KO, Ornellas FL, Martin PK, Patti CL, Mello LE, Frussa-Filho R, Han SW, Longo BM. Therapeutic effects of the transplantation of VEGF overexpressing bone marrow mesenchymal stem cells in the hippocampus of murine model of Alzheimer's disease. *Front Aging Neurosci.* 2014; 6:30. <https://doi.org/10.3389/fnagi.2014.00030> PMID:[24639647](#)
64. Ferdousi F, Sasaki K, Uchida Y, Ohkohchi N, Zheng YW, Isoda H. Exploring the Potential Role of Rosmarinic Acid in Neuronal Differentiation of Human Amnion Epithelial Cells by Microarray Gene Expression Profiling. *Front Neurosci.* 2019; 13:779. <https://doi.org/10.3389/fnins.2019.00779> PMID:[31396047](#)
65. Liberzon A. A description of the Molecular Signatures Database (MSigDB) Web site. *Methods Mol Biol.* 2014; 1150:153–60. [https://doi.org/10.1007/978-1-4939-0512-6\\_9](https://doi.org/10.1007/978-1-4939-0512-6_9) PMID:[24743996](#)
66. Subramanian A, Tamayo P, Mootha VK, Mukherjee S, Ebert BL, Gillette MA, Paulovich A, Pomeroy SL, Golub TR, Lander ES, Mesirov JP. Gene set enrichment analysis: a knowledge-based approach for interpreting genome-wide expression profiles. *Proc Natl Acad Sci USA.* 2005; 102:15545–50. <https://doi.org/10.1073/pnas.0506580102> PMID:[16199517](#)
67. Huang W, Sherman BT, Lempicki RA. Systematic and integrative analysis of large gene lists using DAVID bioinformatics resources. *Nat Protoc.* 2009; 4:44–57. <https://doi.org/10.1038/nprot.2008.211> PMID:[19131956](#)
68. Huang W, Sherman BT, Lempicki RA. Bioinformatics enrichment tools: paths toward the comprehensive functional analysis of large gene lists. *Nucleic Acids Res.* 2009; 37:1–13. <https://doi.org/10.1093/nar/gkn923> PMID:[19033363](#)

## SUPPLEMENTARY MATERIALS

### Supplementary Figure

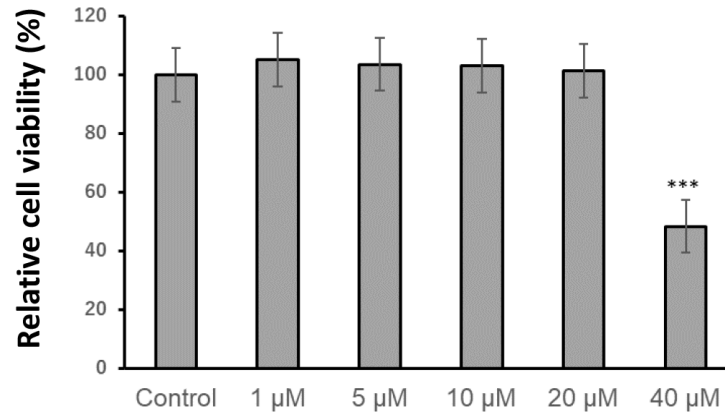

**Supplementary Figure 1.** hAECs were exposed to verbenalin at concentrations of 1, 5, 10, 20, and 40 μM for 72 h. The control cells were not treated. Cell viability was measured by the MTT assay and was calculated as a percentage of that in the control group (100%). The results are expressed as the means ± standard error of the mean (SEM) of independent experiments (n = 4, 96-well plate). \*\*\*p < 0.001 compared with control (untreated) cells.

## Supplementary Tables

Please browse Full Text version to see the data of Supplementary Table 3.

**Supplementary Table 1. Top 20 upregulated genes (verbenalin-treated hAECs vs D7 Control) and their Gene Ontology (GO).**

| Gene Symbol | Description                                                     | Fold Change (Ver. vs D7 Control) | Molecular Function* (GO ID)                                                                    | Biological Process* (GO ID)                                                                                                                       |
|-------------|-----------------------------------------------------------------|----------------------------------|------------------------------------------------------------------------------------------------|---------------------------------------------------------------------------------------------------------------------------------------------------|
| WSB1        | WD repeat and SOCS box containing 1                             | 3.07                             | Protein Binding (GO:0005515)                                                                   | Protein Ubiquitination (GO:0016567)                                                                                                               |
| SS18#       | Synovial sarcoma translocation, chromosome 18                   | 1.98                             | Protein Binding (GO:0005515); Nuclear Receptor Transcription Coactivator Activity (GO:0030374) | Microtubule Cytoskeleton Organization (GO:0000226); Intracellular Signal Transduction (GO:0035556)                                                |
| DLEU2       | Deleted in lymphocytic leukemia 2 (non-protein coding)          | 1.97                             | No Data Available                                                                              | No Data Available                                                                                                                                 |
| ASAH2B      | N-acyl sphingosine amidohydrolase (non-lysosomal ceramidase) 2B | 1.94                             | N-Acyl sphingosine Amidohydrolase Activity (GO:0017040)                                        | Sphingosine Biosynthetic Process (GO:0046512); Ceramide Catabolic Process (GO:0046514)                                                            |
| TRIM16      | Tripartite motif containing 16                                  | 1.71                             | Protein Binding (GO:0005515); Interleukin-1 Binding (GO:0019966)                               | Histone H3 Acetylation (GO:0043966); Histone H4 Acetylation (GO:0043967)                                                                          |
| NCOA7       | Nuclear receptor coactivator 7                                  | 1.68                             | Protein Binding (GO:0005515); Nuclear Receptor Transcription Coactivator Activity (GO:0030374) | Negative Regulation of Oxidative Stress-Induced Neuron Death (GO:1903204); Positive Regulation of Transcription By RNA Polymerase II (GO:0045944) |
| SLC39A8     | Solute carrier family 39 (zinc transporter), member 8           | 1.66                             | Zinc Ion Transmembrane Transporter Activity (GO:0005385)                                       | Ion Transport (GO:0006811); Transmembrane Transport (GO:0055085)                                                                                  |
| GTF2H2      | General transcription factor IIH, polypeptide 2                 | 1.62                             | Protein Binding (GO:0005515); Nucleic Acid Binding (GO:0003676)                                | G Protein-Coupled Receptor Internalization (GO:0002031); DNA Repair (GO:0006281)                                                                  |
| NME1        | NME/NM23 nucleoside diphosphate kinase 1                        | 1.52                             | Magnesium Ion Binding (GO:0000287)                                                             | GTP (GO:0006183)-, UTP (GO:0006228)-, CTP (GO:0006241)- Biosynthetic Process                                                                      |

|         |                                     |      |                                                          |                                                             |
|---------|-------------------------------------|------|----------------------------------------------------------|-------------------------------------------------------------|
| TBC1D28 | TBC1 domain family, member 28       | 1.52 | GTPase Activator Activity (GO:0005096)                   | Intracellular Protein Transport (GO:0006886)                |
| GPR89A  | G protein-coupled receptor 89A      | 1.48 | Voltage-Gated Ion Channel Activity (GO:0005244)          | Ion Transport (GO:0006811); Protein Transport (GO:0015031)  |
| LIMCH1  | LIM and calponin homology domains 1 | 1.46 | Protein Binding (GO:0005515); Actin Binding (GO:0003779) | Positive Regulation of Protein Phosphorylation (GO:0001934) |

---

**Supplementary Table 2. Top 20 downregulated genes (verbenalin-treated hAECs vs. D7 Control) and their Gene Ontology (GO).**

| <b>Gene Symbol</b> | <b>Description</b>                                             | <b>Fold Change (Ver. vs D7 Control)</b> | <b>Molecular Function* (GO ID)</b>                                                         | <b>Biological Process* (GO ID)</b>                                                                                                               |
|--------------------|----------------------------------------------------------------|-----------------------------------------|--------------------------------------------------------------------------------------------|--------------------------------------------------------------------------------------------------------------------------------------------------|
| CCDC122            | Coiled-coil domain containing 122                              | -2.09                                   | No Data Available                                                                          | No Data Available                                                                                                                                |
| STARD10            | StAR-related lipid transfer (START) domain containing 10       | -2.09                                   | Protein Binding (Go:0005515); Phospholipid Transporter Activity (Go:0005548)               | Phosphatidylcholine Biosynthetic Process (Go:0006656)                                                                                            |
| CAMK2G#            | Calcium/calmodulin-dependent protein kinase II gamma           | -2.07                                   | Calmodulin-Dependent Protein Kinase Activity (GO:0004683); Nucleotide Binding (GO:0000166) | Protein Phosphorylation (GO:0006468)                                                                                                             |
| GOLGA2             | Golgin A2                                                      | -2.02                                   | Protein Binding (Go:0005515); Microtubule Binding (Go:0008017)                             | Protein Glycosylation (Go:0006486); Microtubule Nucleation (Go:0007020); Golgi Organization (Go:0007030)                                         |
| NBPF10             | Neuroblastoma breakpoint family, member 10;                    | -2.01                                   | RNA Binding (GO:0003723)                                                                   | Notch Signaling Pathway (GO:0007219)                                                                                                             |
| PEG10#             | Paternally expressed 10                                        | -2.01                                   | Protein Binding (Go:0005515); Rna Binding (Go:0003723); Nucleic Acid Binding (Go:0003676)  | Apoptotic Process (Go:0006915)                                                                                                                   |
| ARHGAP21#          | Rho gtpase activating protein 21                               | -2                                      | Protein Binding (Go:0005515);                                                              | Golgi Organization (Go:0007030); Signal Transduction (Go:0007165)                                                                                |
| MAST4              | Microtubule associated serine/threonine kinase family member 4 | -1.96                                   | Protein Binding (Go:0005515); Magnesium Ion Binding (Go:0000287)                           | Cytoskeleton Organization (Go:0007010); Protein Phosphorylation (Go:0006468)                                                                     |
| FAM65B#            | Family with sequence similarity 65, member B                   | -1.93                                   | No Data Available                                                                          | No Data Available                                                                                                                                |
| TMEM8A#            | Transmembrane protein 8A                                       | -1.93                                   | Phospholipase A2 Activity (GO:0004623)                                                     | Biological_Process (GO:0008150)                                                                                                                  |
| DYNC1H1#           | Dynein, cytoplasmic 1, heavy chain 1                           | -1.89                                   | Nucleotide Binding (GO:0000166); Microtubule Motor Activity (GO:0003777)                   | Microtubule-Based Movement (GO:0007018); ER To Golgi Vesicle-Mediated Transport (GO:0006888); G2/M Transition of Mitotic Cell Cycle (GO:0000086) |

|         |                                                    |       |                                                                       |                                                                                                      |
|---------|----------------------------------------------------|-------|-----------------------------------------------------------------------|------------------------------------------------------------------------------------------------------|
| VEGFB#  | Vascular endothelial growth factor B               | -1.89 | Vascular Endothelial Growth Factor Receptor Binding (GO:0005172)      | Angiogenesis (GO:0001525); Sprouting Angiogenesis (GO:0002040); Response to Hypoxia (GO:0001666)     |
| SMAP1#  | Small arfgap 1                                     | -1.83 | GTPase Activator Activity (GO:0005096); Clathrin Binding (GO:0030276) | Positive Regulation of GTPase Activity (GO:0043547)                                                  |
| GOLGB1# | Golgin B1                                          | -1.74 | DNA-Binding Transcription Factor Activity (GO:0003700)                | ER to Golgi Vesicle-Mediated Transport (GO:0006888)                                                  |
| USF2#   | Upstream transcription factor 2, c-fos interacting | -1.65 | Protein Homodimerization Activity (GO:0042803)                        | Regulation of Transcription from RNA Polymerase II Promoter by Glucose (GO:0000430)                  |
| CHRNA1  | Cholinergic receptor, nicotinic, beta 1 (muscle)   | -1.62 | Transmembrane Signaling Receptor Activity (GO:0004888)                | Postsynaptic Membrane Organization (GO:0001941)                                                      |
| LAMP2   | Lysosomal-associated membrane protein 2            | -1.61 | Protein Domain Specific Binding (GO:0019904)                          | Protein Targeting (GO:0006605); Autophagy (GO:0006914)                                               |
| ZKSCAN1 | Zinc finger with KRAB and SCAN domains 1           | -1.61 | DNA-Binding Transcription Factor Activity (GO:0003700)                | Regulation of Transcription, DNA-Templated (GO:0006355)                                              |
| FAM195B | Family with sequence similarity 195, member B      | -1.59 | No Data Available                                                     | No Data Available                                                                                    |
| PDLIM4# | PDZ and LIM domain 4                               | -1.59 | Protein Binding (Go:0005515); Actin Binding (Go:0003779)              | Actin Cytoskeleton Organization (Go:0030036); Excitatory Chemical Synaptic Transmission (Go:0098976) |

**Supplementary Table 3. List of DEGs in verbenalin-treated hAECs associated with AD.**
