# Supplementary material for: Microarray analysis of verbenalin-treated human amniotic epithelial cells reveals therapeutic potential for Alzheimer’s Disease
Source: publisher site journal article supplement (doi:10.18632/aging.102985), 2020-03-29
Supplement: Supplementary file [file aging-v12i6-102985-supplementary-material-SD1.pdf]

## SUPPLEMENTARY FIGURE

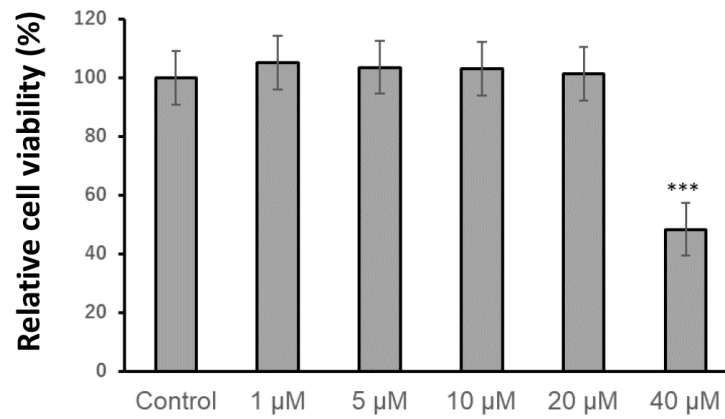

**Supplementary Figure 1. hAECs were exposed to verbenalin at concentrations of 1, 5, 10, 20, and 40 μM for 72 h.** The control cells were not treated. Cell viability was measured by the MTT assay and was calculated as a percentage of that in the control group (100%). The results are expressed as the means  $\pm$  standard error of the mean (SEM) of independent experiments (n = 4, 96-well plate). \*\*\*p < 0.001 compared with control (untreated) cells.
