# Supplementary material for: Microarray analysis of verbenalin-treated human amniotic epithelial cells reveals therapeutic potential for Alzheimer’s Disease
Source: publisher site journal article supplement (doi:10.18632/aging.102985), 2020-03-29
Supplement: Supplementary file [file aging-v12i6-102985-supplementary-material-SD3.pdf]

**Supplementary Table 3.** List of DEGs in verbenalin-treated hAECs associated with AD

| Gene Symbol                                                                        | Gene Name                                                                                                        | Fold Change        |                    |
|------------------------------------------------------------------------------------|------------------------------------------------------------------------------------------------------------------|--------------------|--------------------|
|                                                                                    |                                                                                                                  | Ver. vs D0 control | Ver. vs D7 control |
| <b>Genes up-regulated in brain from patients with Alzheimer's disease (n = 44)</b> |                                                                                                                  |                    |                    |
| <b>Group A gene list</b>                                                           |                                                                                                                  |                    |                    |
| TMEM8A*                                                                            | Transmembrane Protein 8A                                                                                         | -4.46              | -1.93              |
| VEGFB                                                                              | Vascular Endothelial Growth Factor B                                                                             | ns                 | -1.89              |
| GOLGB1                                                                             | Golgin B1                                                                                                        | ns                 | -1.74              |
| USF2                                                                               | Upstream Transcription Factor 2, c-Fos Interacting                                                               | ns                 | -1.65              |
| PDLIM4                                                                             | PDZ And LIM Domain 4                                                                                             | -1.80              | -1.59              |
| TAF15 <sup>§</sup>                                                                 | TAF15 RNA Polymerase II, TATA Box Binding Protein (TBP)-Associated Factor, 68kda                                 | -3.93              | -1.56              |
| NR2F6                                                                              | Nuclear Receptor Subfamily 2, Group F, Member 6                                                                  | -2.93              | -1.54              |
| FAM3A*                                                                             | Family with Sequence Similarity 3, Member A                                                                      | -1.66              | -1.47              |
| C1S                                                                                | Complement Component 1, S Subcomponent                                                                           | 3.98               | -1.45              |
| EGFR                                                                               | Epidermal Growth Factor Receptor                                                                                 | -3.35              | -1.41              |
| SERTAD2                                                                            | SERTA Domain Containing 2                                                                                        | 1.42               | -1.39              |
| ARHGAP17*                                                                          | Rho GTPase Activating Protein 17                                                                                 | -1.40              | -1.38              |
| MYO6                                                                               | Myosin VI                                                                                                        | ns                 | -1.37              |
| MUC1                                                                               | Mucin 1, Cell Surface Associated                                                                                 | 3.35               | -1.34              |
| PAK4                                                                               | P21 Protein (Cdc42/Rac)-Activated Kinase 4                                                                       | -1.56              | -1.34              |
| TAOK2*                                                                             | TAO Kinase 2                                                                                                     | -1.44              | -1.33              |
| TPD52*                                                                             | Tumor Protein D52                                                                                                | -2.42              | -1.32              |
| IQGAP1                                                                             | IQ Motif Containing GTPase Activating Protein 1                                                                  | -1.69              | -1.31              |
| GNA12                                                                              | Guanine Nucleotide Binding Protein (G Protein) Alpha 12                                                          | -1.73              | -1.30              |
| IFNA5*                                                                             | Interferon, Alpha 5                                                                                              | ns                 | -1.25              |
| MAP4                                                                               | Microtubule-Associated Protein 4                                                                                 | -3.75              | -1.25              |
| HDGF                                                                               | Hepatoma-Derived Growth Factor                                                                                   | -1.67              | -1.21              |
| LAMP1                                                                              | Lysosomal-Associated Membrane Protein 1                                                                          | 1.19               | -1.20              |
| CUX1 <sup>§</sup>                                                                  | Cut-Like Homeobox 1                                                                                              | -1.45              | -1.18              |
| SEMA4F                                                                             | Sema Domain, Immunoglobulin Domain (Ig), Transmembrane Domain (TM) And Short Cytoplasmic Domain, (Semaphorin) 4F | 1.28               | -1.18              |
| SNED1                                                                              | Sushi, Nidogen and EGF-Like Domains 1                                                                            | ns                 | -1.17              |
| TRPS1                                                                              | Trichorhinophalangeal Syndrome I                                                                                 | ns                 | -1.17              |
| CPT2*                                                                              | Carnitine Palmitoyl Transferase 2                                                                                | ns                 | -1.15              |
| GOLGA1                                                                             | Golgin A1                                                                                                        | ns                 | -1.13              |
| NAP1L4                                                                             | Nucleosome Assembly Protein 1-Like 4                                                                             | -1.86              | -1.12              |
| RPL28                                                                              | Ribosomal Protein L28                                                                                            | -1.76              | -1.11              |
| PZP                                                                                | Pregnancy-Zone Protein                                                                                           | 1.44               | -1.10              |
| DLG5                                                                               | Discs, Large Homolog 5 (Drosophila)                                                                              | ns                 | 1.10               |
| GOSR2                                                                              | Golgi SNAP Receptor Complex Member 2                                                                             | -1.82              | 1.14               |
| DAZAP2                                                                             | DAZ Associated Protein 2                                                                                         | ns                 | 1.16               |
| TCF7L1                                                                             | Transcription Factor 7-Like 1 (T-Cell Specific, HMG-Box)                                                         | 1.35               | 1.17               |
| NSUN5P1;<br>NSUN5P2                                                                | NOP2/Sun Domain Family, Member 5 Pseudogene 1; NOP2/Sun Domain Family, Member 5 Pseudogene 2                     | 1.48               | 1.21               |
| EDNRA                                                                              | Endothelin Receptor Type A                                                                                       | 1.14               | 1.24               |

|                                                                                          |                                                                                      |       |       |
|------------------------------------------------------------------------------------------|--------------------------------------------------------------------------------------|-------|-------|
| ABL1                                                                                     | C-ABL Oncogene 1, Non-Receptor Tyrosine Kinase                                       | -2.17 | 1.25  |
| DMC1                                                                                     | DNA Meiotic Recombinase 1                                                            | -1.07 | 1.27  |
| TAF11                                                                                    | TAF11 RNA Polymerase II, TATA Box Binding Protein (TBP)-Associated Factor, 28kda     | -1.42 | 1.33  |
| IFIT5                                                                                    | Interferon-Induced Protein with Tetratricopeptide Repeats 5                          | 2.40  | 1.35  |
| PTTG1IP                                                                                  | Pituitary Tumor-Transforming 1 Interacting Protein                                   | ns    | 1.40  |
| <b>Genes down-regulated in brain from patients with Alzheimer's disease (n = 29)</b>     |                                                                                      |       |       |
| <b>Group B gene list</b>                                                                 |                                                                                      |       |       |
| PEG10 <sup>‡</sup>                                                                       | Paternally Expressed 10                                                              | 2.77  | -2.01 |
| FAM65B                                                                                   | Family with Sequence Similarity 65, Member B                                         | 5.44  | -1.93 |
| DYNC1H1 <sup>†,‡,⊥</sup>                                                                 | Dynein, Cytoplasmic 1, Heavy Chain 1                                                 | ns    | -1.89 |
| SMAP1                                                                                    | Small ARFGAP 1                                                                       | ns    | -1.83 |
| MEF2A <sup>§</sup>                                                                       | Myocyte Enhancer Factor 2a                                                           | 1.71  | -1.52 |
| SLC7A2                                                                                   | Solute Carrier Family 7, Member 2                                                    | ns    | -1.52 |
| SERGEF                                                                                   | Secretion Regulating Guanine Nucleotide Exchange Factor                              | ns    | -1.45 |
| ARPP19 <sup>†</sup>                                                                      | CAMP-Regulated Phosphoprotein, 19kda                                                 | ns    | -1.40 |
| PEX19 <sup>†</sup>                                                                       | Peroxisomal Biogenesis Factor 19                                                     | ns    | -1.35 |
| ZFR <sup>§</sup>                                                                         | Zinc Finger RNA Binding Protein                                                      | 1.96  | -1.34 |
| OPA1 <sup>§</sup>                                                                        | Optic Atrophy 1 (Autosomal Dominant)                                                 | ns    | -1.33 |
| STK24 <sup>‡,⊥</sup>                                                                     | Serine/Threonine Kinase 24                                                           | 1.50  | -1.31 |
| GNAS <sup>†,§,⊥</sup>                                                                    | GNAS Complex Locus                                                                   | -1.68 | -1.27 |
| NDFIP1                                                                                   | Nedd4 Family Interacting Protein 1                                                   | -2.36 | -1.27 |
| USO1 <sup>†</sup>                                                                        | USO1 Vesicle Transport Factor                                                        | -1.19 | -1.26 |
| YME1L1 <sup>†</sup>                                                                      | YME1-Like 1 ATPase                                                                   | 1.56  | -1.26 |
| LZTS1                                                                                    | Leucine Zipper, Putative Tumor Suppressor 1                                          | ns    | -1.25 |
| NFYC                                                                                     | Nuclear Transcription Factor Y, Gamma                                                | -1.81 | -1.25 |
| GNB1 <sup>†,‡,§</sup>                                                                    | Guanine Nucleotide Binding Protein (G Protein), Beta Polypeptide 1                   | -1.99 | -1.19 |
| SYNCRIP                                                                                  | Synaptotagmin-binding, Cytoplasmic RNA Interacting Protein                           | 1.69  | -1.19 |
| DYNLRB1                                                                                  | Dynein, Light Chain, Roadblock-Type 1                                                | -1.43 | -1.18 |
| THY1 <sup>†,‡,⊥</sup>                                                                    | Thy-1 Cell Surface Antigen                                                           | -7.97 | -1.14 |
| APC <sup>§</sup>                                                                         | Adenomatous Polyposis Coli                                                           | ns    | -1.13 |
| RCAN2 <sup>†,‡,⊥</sup>                                                                   | Regulator of Calcineurin 2                                                           | 1.50  | -1.12 |
| SLC12A5 <sup>†</sup>                                                                     | Solute Carrier Family 12 (Potassium/Chloride Transporter), Member 5                  | -1.36 | -1.12 |
| IPO5                                                                                     | Importin 5                                                                           | -2.30 | 1.37  |
| EEF1E1                                                                                   | Eukaryotic Translation Elongation Factor 1 Epsilon 1                                 | -1.28 | 1.33  |
| SLC35A1                                                                                  | Solute Carrier Family 35 (CMP-Sialic Acid Transporter), Member A1                    | ns    | 1.20  |
| PMPCB                                                                                    | Peptidase (Mitochondrial Processing) Beta                                            | 2.1   | 1.19  |
| <b>Interactions of Pathological Hallmark Proteins</b>                                    |                                                                                      |       |       |
| <b>Tubulin Polymerization Promoting Protein/P25, B-Amyloid, And A-Synuclein (n = 22)</b> |                                                                                      |       |       |
| BDP1                                                                                     | B Double Prime 1, Subunit of RNA Polymerase III Transcription Initiation Factor IIIB | ns    | -1.50 |
| PLEKHG6                                                                                  | Pleckstrin Homology Domain-containing, Family G (With RhoGEF Domain) Member 6        | 1.12  | -1.38 |
| SAMD4A                                                                                   | Sterile Alpha Motif Domain Containing 4A                                             | -1.69 | -1.38 |
| CTCFL                                                                                    | CCCTC-Binding Factor (Zinc Finger Protein)-Like                                      | 1.25  | -1.35 |
| SPECC1                                                                                   | Sperm Antigen with Calponin Homology and Coiled-Coil Domains 1                       | -1.96 | -1.21 |
| RNASE1                                                                                   | Ribonuclease, RNase A Family, 1 (Pancreatic)                                         | ns    | -1.17 |
| LIPC                                                                                     | Lipase, Hepatic                                                                      | ns    | -1.14 |

|                                                                                      |                                                                   |       |       |
|--------------------------------------------------------------------------------------|-------------------------------------------------------------------|-------|-------|
| PZP                                                                                  | Pregnancy-Zone Protein                                            | 1.44  | -1.10 |
| DLG5                                                                                 | Discs, Large Homolog 5 (Drosophila)                               | ns    | 1.10  |
| STON2                                                                                | Stonin 2                                                          | ns    | 1.11  |
| ADSS                                                                                 | Adenylosuccinate Synthase                                         | 1.12  | 1.13  |
| FOXD2                                                                                | Forkhead Box D2                                                   | ns    | 1.13  |
| SPNS3                                                                                | Spinster Homolog 3 (Drosophila)                                   | 1.69  | 1.13  |
| CCR2                                                                                 | Chemokine (C-C Motif) Receptor 2                                  | 1.40  | 1.14  |
| DOCK8                                                                                | Dedicator of Cytokinesis 8                                        | 1.89  | 1.14  |
| PLEKHS1                                                                              | Pleckstrin Homology Domain-containing, Family S Member 1          | 1.26  | 1.15  |
| ARHGAP11A                                                                            | Rho GTPase Activating Protein 11A                                 | -3.67 | 1.17  |
| TBXAS1                                                                               | Thromboxane A Synthase 1 (Platelet)                               | 1.67  | 1.18  |
| ANKAR                                                                                | Ankyrin And Armadillo Repeat Containing                           | 1.39  | 1.20  |
| SLC35A1                                                                              | Solute Carrier Family 35 (CMP-Sialic Acid Transporter), Member A1 | ns    | 1.20  |
| EDNRA                                                                                | Endothelin Receptor Type A                                        | 1.14  | 1.24  |
| SS18                                                                                 | Synovial Sarcoma Translocation, Chromosome 18                     | -3.31 | 1.98  |
| <b>Genes having Strong Association with Late-Onset of Alzheimer Disease (n = 11)</b> |                                                                   |       |       |
| ARHGAP19                                                                             | Rho GTPase Activating Protein 19                                  | ns    | -1.11 |
| ARHGAP21                                                                             | Rho GTPase Activating Protein 21                                  | -1.82 | -2.00 |
| CAMK2G                                                                               | Calcium/Calmodulin-Dependent Protein Kinase II Gamma              | -2.81 | -2.07 |
| CUBN                                                                                 | Cubilin (Intrinsic Factor-Cobalamin Receptor)                     | 1.46  | -1.18 |
| FAM107B                                                                              | Family with Sequence Similarity 107, Member B                     | -1.82 | -1.35 |
| IFIT5                                                                                | Interferon-Induced Protein with Tetratricopeptide Repeats 5       | 2.40  | 1.35  |
| ITIH5                                                                                | Inter-Alpha-Trypsin Inhibitor Heavy Chain Family, Member 5        | 2.87  | -1.30 |
| NHLRC2                                                                               | NHL Repeat Containing 2                                           | ns    | -1.22 |
| RNLS                                                                                 | Renalase, FAD-Dependent Amine Oxidase                             | ns    | -1.17 |
| WAPAL                                                                                | Wings Apart-Like Homolog (Drosophila)                             | ns    | -1.14 |
| YME1L1                                                                               | YME1-Like 1 ATPase                                                | 1.56  | -1.26 |
| <b>Genes Associated with Neurodegeneration (n = 6)</b>                               |                                                                   |       |       |
| CLN3                                                                                 | Ceroid-Lipofuscinosis, Neuronal 3                                 | 1.67  | 1.24  |
| CTSD                                                                                 | Cathepsin D                                                       | 1.26  | -1.51 |
| DYNC1H1                                                                              | Dynein, Cytoplasmic 1, Heavy Chain 1                              | ns    | -1.89 |
| HSPB1                                                                                | Heat Shock 27kda Protein 1                                        | ns    | -1.31 |
| OPA1                                                                                 | Optic Atrophy 1 (Autosomal Dominant)                              | ns    | -1.33 |
| SBF2                                                                                 | SET Binding Factor 2                                              | ns    | -1.32 |

\*Genes up-regulated in patients at the incipient stage of AD.

†Genes whose expression significantly and positively correlated with the density of CALB1-positive [GeneID=793] GABAergic interneurons in the BA9 brain region across all subjects with psychiatric disorders (n = 10).

‡Genes whose expression significantly and positively correlated with oligodendrocyte density in layer VI of BA9 brain region (prefrontal cortex) in patients with bipolar disorder (n = 7).

§Genes down-regulated in patients at the incipient stage of Alzheimer's disease (n = 6)

±Genes whose expression was significantly and positively correlated with the number of perineuronal oligodendrocytes in the layer III of BA9 brain region (n = 5).

§Genes up-regulated in peripheral lymphocytes from old individuals compared to those from young donors.
